# Supplementary material for: Influence of the catalyst structure in the cycloaddition of isocyanates to oxiranes promoted by tetraarylstibonium cations
Source: Royal Society of Chemistry journal article supplement (doi:10.1039/c8dt00702k), 2018-01-01
Supplement: c8dt00702k1.pdf [file c8dt00702k1.pdf]

## Influence of the catalyst structure in the cycloaddition of oxiranes and isocyanates promoted by tetraarylstibonium cations

Mengxi Yang, Nilanjana Pati, Guillaume Bélanger-Chabot, and François P. Gabbaï\*

<sup>a</sup>Department of Chemistry, Texas A&M University, College Station, Texas 77843-3255, United States.

Email: [francois@tamu.edu](mailto:francois@tamu.edu)

### This PDF file includes:

|                                                                                                                                  |     |
|----------------------------------------------------------------------------------------------------------------------------------|-----|
| <b>Figure S1.</b> <sup>1</sup> H NMR of <b>2</b> [OTf] in CDCl <sub>3</sub> .....                                                | S3  |
| <b>Figure S2.</b> <sup>13</sup> C NMR of <b>2</b> [OTf] in CDCl <sub>3</sub> .....                                               | S4  |
| <b>Figure S3.</b> <sup>19</sup> F NMR of <b>2</b> [OTf] in CDCl <sub>3</sub> .....                                               | S4  |
| <b>Figure S4.</b> Crystal structure of <b>2</b> <sup>+</sup> in <b>2</b> [OTf].....                                              | S4  |
| <b>Figure S5.</b> <sup>1</sup> H NMR of <b>4</b> [OTf] in CDCl <sub>3</sub> .....                                                | S5  |
| <b>Figure S6.</b> <sup>13</sup> C NMR of <b>4</b> [OTf] in CDCl <sub>3</sub> .....                                               | S5  |
| <b>Figure S7.</b> <sup>19</sup> F NMR of <b>4</b> [OTf] in CDCl <sub>3</sub> .....                                               | S5  |
| <b>Figure S8.</b> <sup>1</sup> H NMR of <b>5</b> [OTf] in CDCl <sub>3</sub> .....                                                | S6  |
| <b>Figure S9.</b> <sup>13</sup> C NMR of <b>5</b> [OTf] in CDCl <sub>3</sub> .....                                               | S6  |
| <b>Figure S10.</b> <sup>19</sup> F NMR of <b>5</b> [OTf] in CDCl <sub>3</sub> .....                                              | S6  |
| <b>Figure S11.</b> <sup>1</sup> H NMR of <b>6</b> [OTf] in CDCl <sub>3</sub> .....                                               | S7  |
| <b>Figure S12.</b> <sup>13</sup> C NMR of <b>6</b> [OTf] in CDCl <sub>3</sub> .....                                              | S7  |
| <b>Figure S13.</b> <sup>19</sup> F NMR of <b>6</b> [OTf] in CDCl <sub>3</sub> .....                                              | S7  |
| <b>Figure S14.</b> <sup>19</sup> F NMR of <b>7</b> [SbCl <sub>6</sub> ] in CD <sub>3</sub> CN.....                               | S8  |
| <b>Figure S15.</b> <sup>13</sup> C NMR of <b>7</b> [SbCl <sub>6</sub> ] in CD <sub>3</sub> CN.....                               | S8  |
| <b>Figure S16.</b> Representative <sup>1</sup> H NMR spectrum collected during the experiment presented in Table 1, Entry 1..... | S9  |
| <b>Figure S17.</b> Representative <sup>1</sup> H NMR spectrum collected during the experiment presented in Table 1, Entry 2..... | S10 |
| <b>Figure S18.</b> Representative <sup>1</sup> H NMR spectrum collected during the experiment presented in Table 1, Entry 3..... | S10 |
| <b>Figure S19.</b> Representative <sup>1</sup> H NMR spectrum collected during the experiment presented in Table 1, Entry 4..... | S11 |
| <b>Figure S20.</b> Representative <sup>1</sup> H NMR spectrum collected during the experiment presented in Table 1, Entry 5..... | S11 |
| <b>Figure S21.</b> Representative <sup>1</sup> H NMR spectrum collected during the experiment presented in Table 1, Entry 6..... | S12 |
| <b>Figure S22.</b> Representative <sup>1</sup> H NMR spectrum collected during the experiment presented in Table 1, Entry 7..... | S12 |
| <b>Figure S23.</b> Representative <sup>1</sup> H NMR spectrum collected during the experiment presented in Table 1, Entry 8..... | S13 |
| <b>Figure S23.</b> <sup>1</sup> H NMR of the stoichiometric reaction of <b>5</b> [OTf] and propylene oxide.....                  | S13 |
| <b>Figure S23.</b> <sup>1</sup> H NMR of the stoichiometric reaction of <b>6</b> [OTf] and propylene oxide.....                  | S14 |
| <b>Figure S24.</b> Representative <sup>1</sup> H NMR spectrum collected during the experiment presented in Table 2, Entry 1..... | S15 |
| <b>Figure S25.</b> Representative <sup>1</sup> H NMR spectrum collected during the experiment presented in Table 2, Entry 2..... | S15 |
| <b>Figure S26.</b> Representative <sup>1</sup> H NMR spectrum collected during the experiment presented in Table 2, Entry 3..... | S16 |
| <b>Figure S27.</b> Representative <sup>1</sup> H NMR spectrum collected during the experiment presented in Table 2, Entry 4..... | S17 |
| <b>Figure S28.</b> Representative <sup>1</sup> H NMR spectrum collected during the experiment presented in Table 2, Entry 5..... | S18 |
| <b>Figure S29.</b> Representative <sup>1</sup> H NMR spectrum collected during the experiment presented in Table 2, Entry 6..... | S18 |
| <b>Figure S30.</b> <sup>1</sup> H NMR of 4-methyl-3-phenyl-2-oxazolidinone ( <b>A1</b> ) in CDCl <sub>3</sub> .....              | S19 |
| <b>Figure S31.</b> <sup>13</sup> C NMR of 4-methyl-3-phenyl-2-oxazolidinone ( <b>A1</b> ) in CDCl <sub>3</sub> .....             | S20 |
| <b>Figure S32.</b> <sup>1</sup> H NMR of 5-methyl-3-phenyl-2-oxazolidinone ( <b>B1</b> ) in CDCl <sub>3</sub> .....              | S20 |
| <b>Figure S33.</b> <sup>13</sup> C NMR of 5-methyl-3-phenyl-2-oxazolidinone ( <b>B1</b> ) in CDCl <sub>3</sub> .....             | S21 |
| <b>Figure S34.</b> <sup>1</sup> H NMR of 3,4-diphenyl-2-oxazolidinone ( <b>A2</b> ) in CDCl <sub>3</sub> .....                   | S22 |

|                                                                                                                 |     |
|-----------------------------------------------------------------------------------------------------------------|-----|
| <b>Figure S35.</b> $^{13}\text{C}$ NMR of 3,4-diphenyl-2-oxazolidinone ( <b>A2</b> ) in $\text{CDCl}_3$ .....   | S23 |
| <b>Figure S36.</b> $^1\text{H}$ NMR of 3,5-diphenyl-2-oxazolidinone ( <b>B2</b> ) in $\text{CDCl}_3$ .....      | S23 |
| <b>Figure S37.</b> $^{13}\text{C}$ NMR of 3,5-diphenyl-2-oxazolidinone ( <b>B2</b> ) in $\text{CDCl}_3$ .....   | S24 |
| <b>Table S1.</b> Crystal data, data collection, and structure refinement for <b>2</b> [OTf] .....               | S25 |
| <b>Table S2.</b> Crystal data, data collection, and structure refinement for <b>4</b> [OTf] .....               | S26 |
| <b>Table S3.</b> Crystal data, data collection, and structure refinement for <b>5</b> [OTf] .....               | S27 |
| <b>Table S4.</b> Crystal data, data collection, and structure refinement for <b>6</b> [OTf] .....               | S28 |
| <b>Table S5.</b> Crystal data, data collection, and structure refinement for <b>7</b> [ $\text{SbCl}_6$ ] ..... | S29 |
| <b>Table S6.</b> XYZ coordinates of the optimized geometry of <b>5</b> $^+$ .....                               | S30 |
| <b>Table S7.</b> XYZ coordinates of the optimized geometry of <b>6</b> $^+$ .....                               | S31 |

## 1 Experimental Section

### 1.1 Synthesis of 1-Naphthyltriphenylstibonium triflate (2[OTf])

2[OTf] has been previously described.<sup>1</sup> As part of the current study, it was prepared as follows. A 100 mL Schlenk flask was charged with 1-bromonaphthalene (600 mg, 2.4 mmol, 1 eq) and 15 mL THF. The solution was cooled to -78 °C and treated with <sup>n</sup>BuLi (2.65 M in hexanes, 1.0 mL, 2.6 mmol, 1.1 eq) which was added drop-wise. The resulting bright yellow solution was stirred at -78 °C for 1 h. Next, the solution was transferred drop wise to a Ph<sub>3</sub>SbBr<sub>2</sub> (1.20g, 2.4 mmol, 1 eq) solution in mixed solvents (6 mL THF, 30 mL Et<sub>2</sub>O) at -78 °C. The reaction mixture, which turned dark yellow, was allowed to warm to room temperature overnight, resulting in a pale-yellow solution. The solvent was removed *in vacuo* to afford an oily solid, which was dissolved in CH<sub>2</sub>Cl<sub>2</sub> and passed through a short plug of Celite in air. After removing CH<sub>2</sub>Cl<sub>2</sub> *in vacuo*, the solid was extracted with methanol and passed through a second plug of Celite in air. Removal of the solvent *in vacuo* afforded a pale-yellow solid which was used without further purification. This solid was dissolved in CH<sub>2</sub>Cl<sub>2</sub> (15 mL) and treated with solid AgOTf (380 mg, 1.5 mmol, 0.6 eq) under N<sub>2</sub> atmosphere. The resulting yellow suspension was allowed to stir at room temperature in the dark for 2 h. The suspension was then filtered over Celite, and the filtrate was reduced and purified by flash chromatography over silica gel (100% ethyl acetate). The second major fraction was collected and washed with hexanes to yield 2[OTf] as air- and moisture- stable white powder (551 mg, 37% yield based on Ph<sub>3</sub>SbBr<sub>2</sub>).

2[OTf]: <sup>1</sup>H NMR (500 MHz, CDCl<sub>3</sub>) δ = 8.33 – 8.24 (m, 1H), 8.14 – 8.05 (m, 1H), 7.86 – 7.55 (m, 19H), 7.55 – 7.45 (m, 1H). <sup>13</sup>C NMR (126 MHz, CDCl<sub>3</sub>) δ = 137.75 (s, naphthyl), 135.72 (s, *o*-Ph), 134.77 (s, naphthyl), 133.92 (s, *p*-Ph), 131.47 (s, *m*-Ph), 130.28 (s, naphthyl), 129.00 (s, naphthyl), 127.80 (s, naphthyl), 126.94 (s, naphthyl), 126.81 (s, naphthyl), 123.17 (s, quaternary, Ph), 120.72 (q, *J*<sub>C-F</sub> = 324.8, OTf). <sup>19</sup>F NMR (470 MHz, CDCl<sub>3</sub>) δ = -78.74 (s, OTf). Spectral data are in accord with the previous report.<sup>1</sup> Single crystals suitable for X-ray diffraction were obtained by slow evaporation of hexanes into a CDCl<sub>3</sub> solution in air.

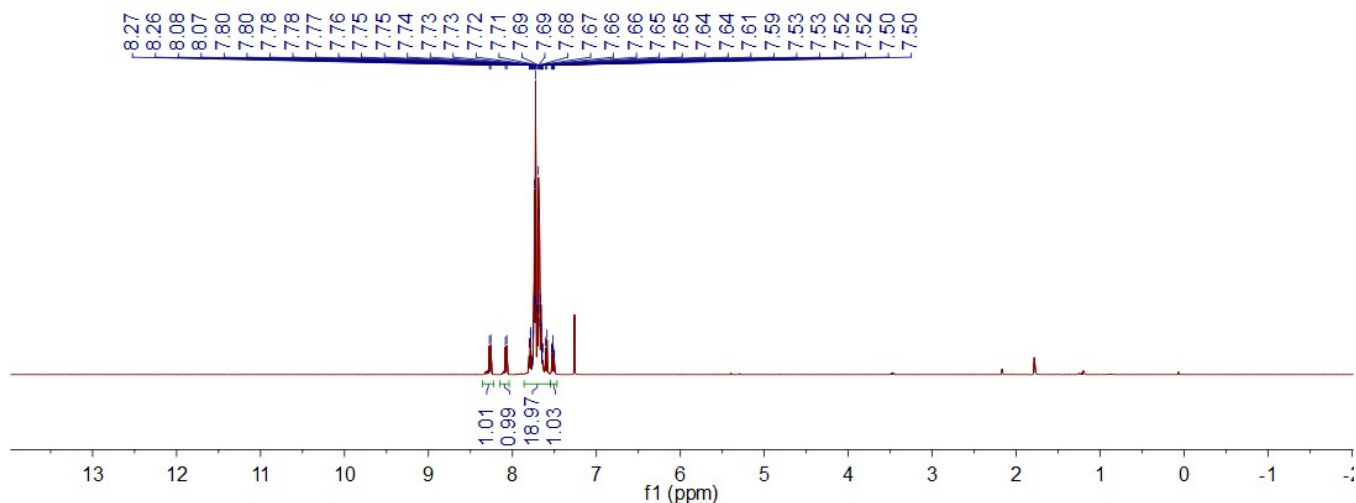

Figure S1. <sup>1</sup>H NMR of 2[OTf] in CDCl<sub>3</sub>.

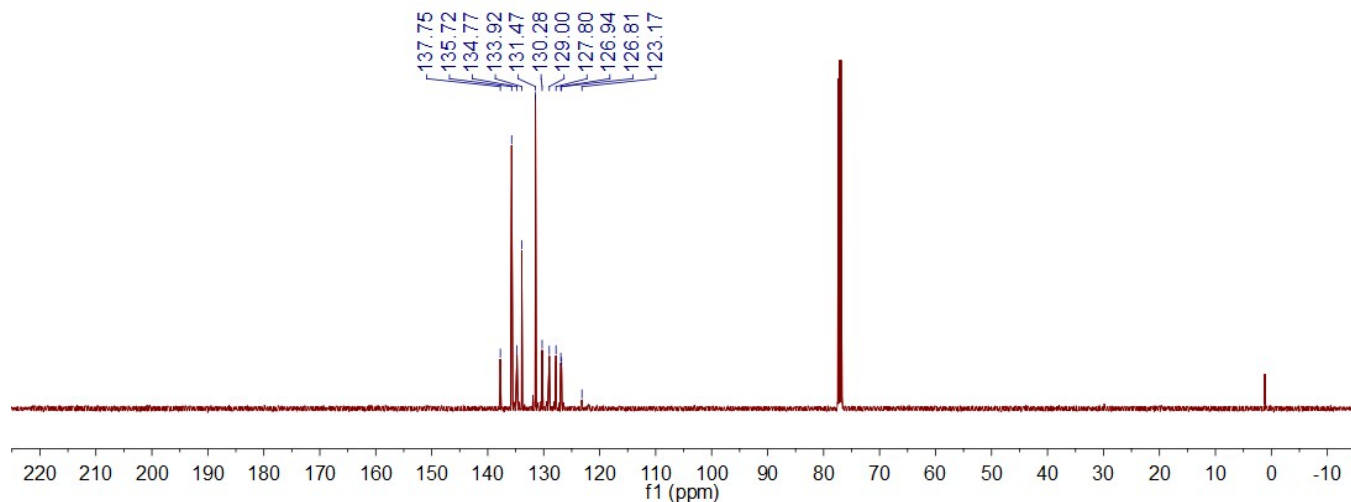

**Figure S2.**  $^{13}\text{C}$  NMR of  $2[\text{OTf}]$  in  $\text{CDCl}_3$ .

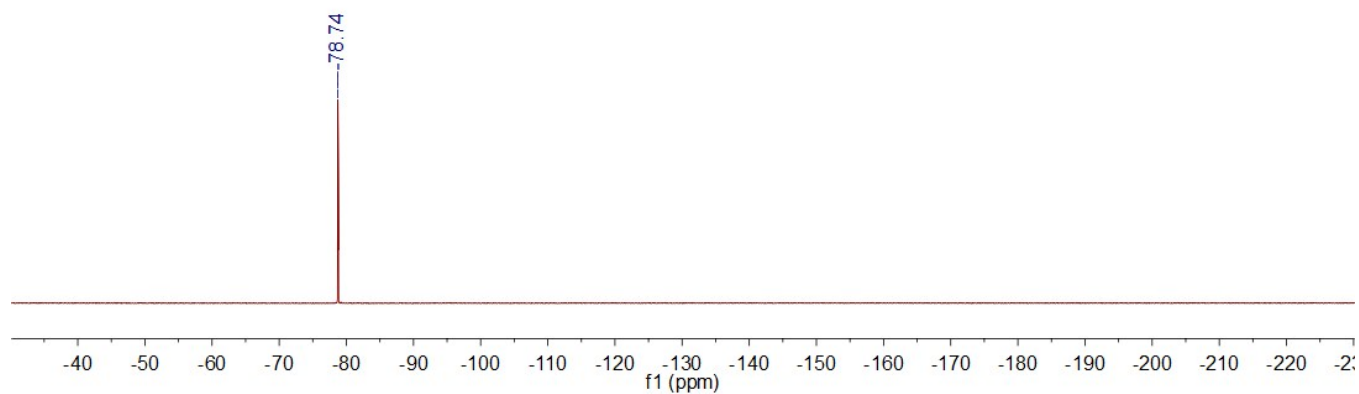

**Figure S3.**  $^{19}\text{F}$  NMR of  $2[\text{OTf}]$  in  $\text{CDCl}_3$ .

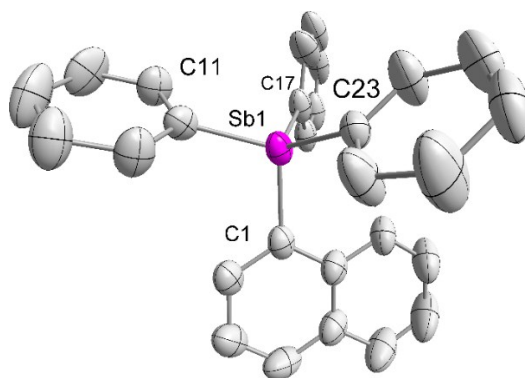

**Figure S4.** Crystal structure of  $2^+$  in  $2[\text{OTf}]$ .

Ellipsoids are drawn at a 50% probability level. The triflate counteranion and the hydrogen atoms are omitted for clarity. Selected bond lengths ( $\text{\AA}$ ) and angles ( $^\circ$ ):  $\text{Sb1-C1} = 2.086(4)$ ,  $\text{Sb1-C11} = 2.085(4)$ ,  $\text{Sb1-C17} = 2.098(4)$ ,  $\text{Sb1-C23} = 2.091(4)$ ,  $\angle\text{C1-Sb1-C11} = 107.0(2)$ ,  $\angle\text{C1-Sb1-C17} = 112.1(2)$ ,  $\angle\text{C1-Sb1-C23} = 104.2(2)$ ,  $\angle\text{C11-Sb1-C17} = 108.1(2)$ ,  $\angle\text{C11-Sb1-C23} = 114.1(2)$ ,  $\angle\text{C17-Sb1-C23} = 111.3(2)$ .

## 1.2 NMR spectra of 4-6[OTf], 7[SbCl<sub>6</sub>]

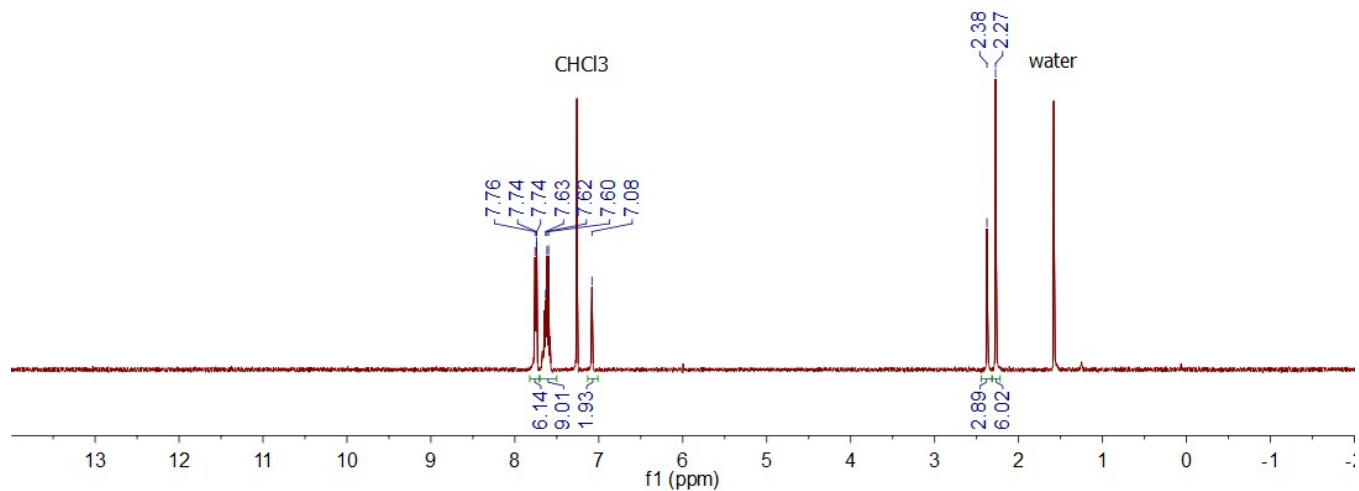

Figure S5. <sup>1</sup>H NMR of 4[OTf] in CDCl<sub>3</sub>.

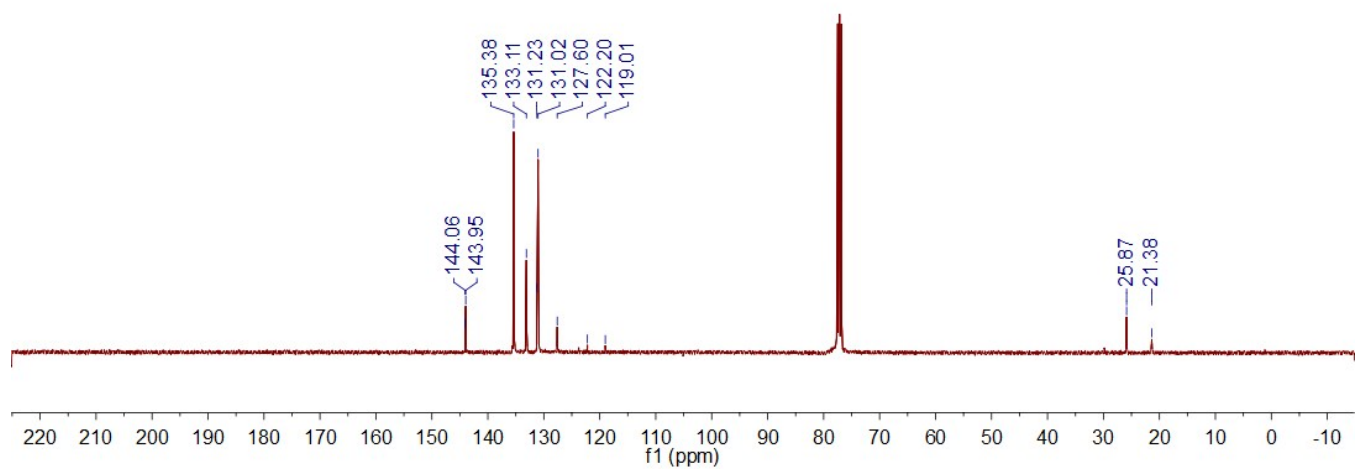

Figure S6. <sup>13</sup>C NMR of 4[OTf] in CDCl<sub>3</sub>.

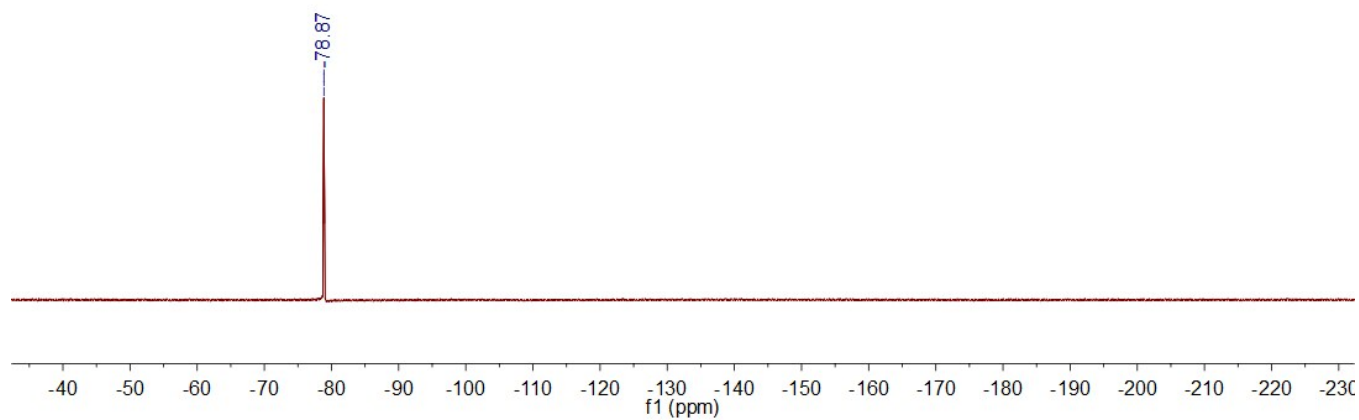

Figure S7. <sup>19</sup>F NMR of 4[OTf] in CDCl<sub>3</sub>.

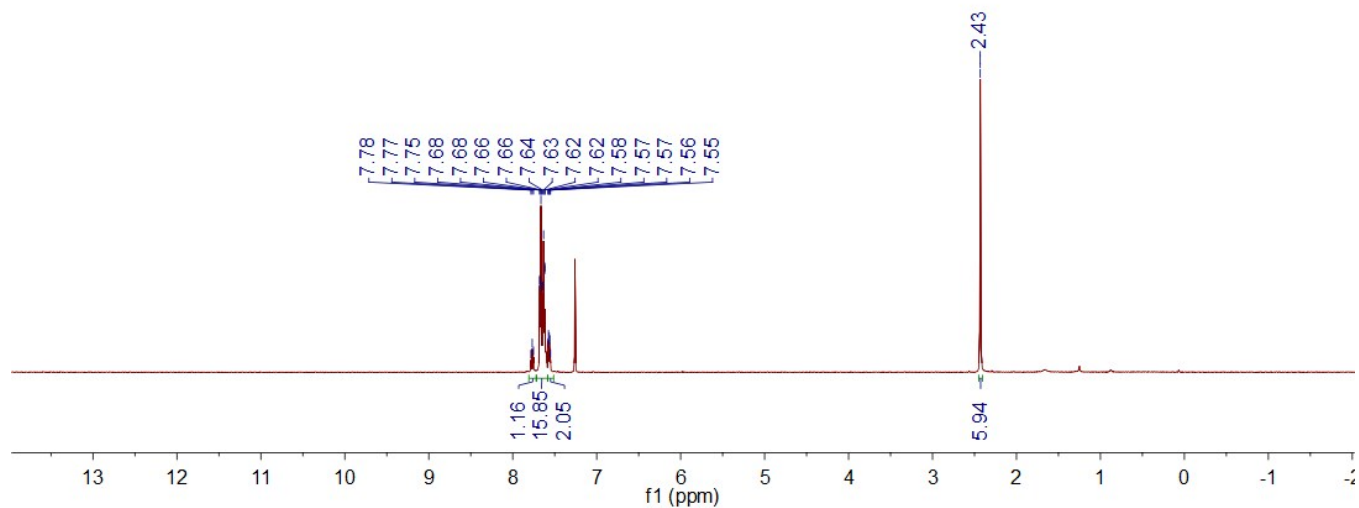

Figure S8.  $^1\text{H}$  NMR of 5[OTf] in  $\text{CDCl}_3$ .

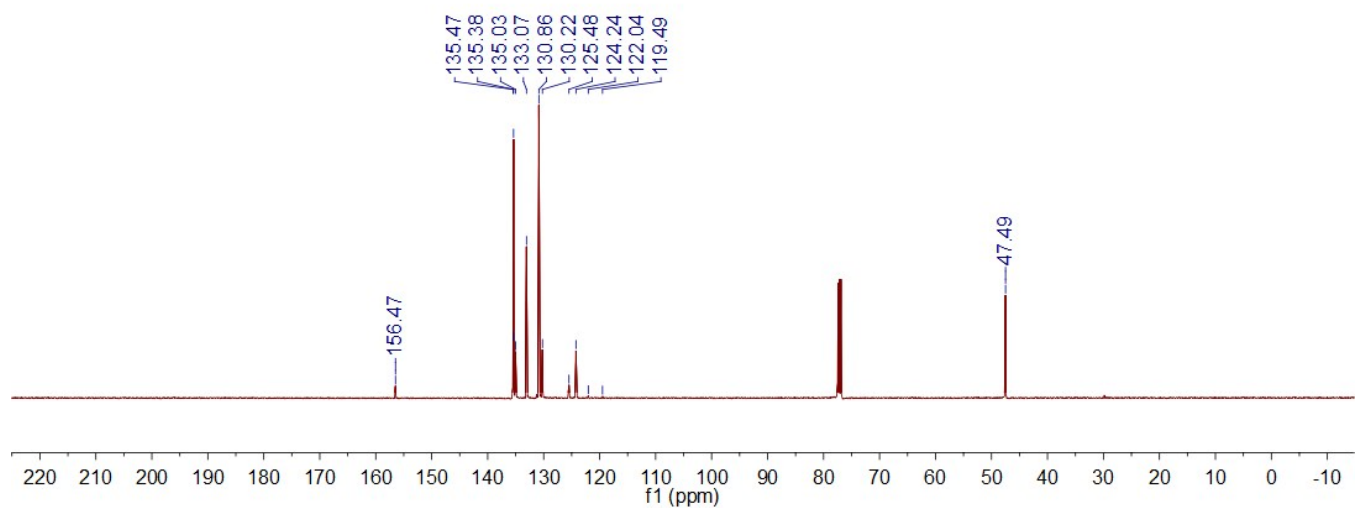

Figure S9.  $^{13}\text{C}$  NMR of 5[OTf] in  $\text{CDCl}_3$ .

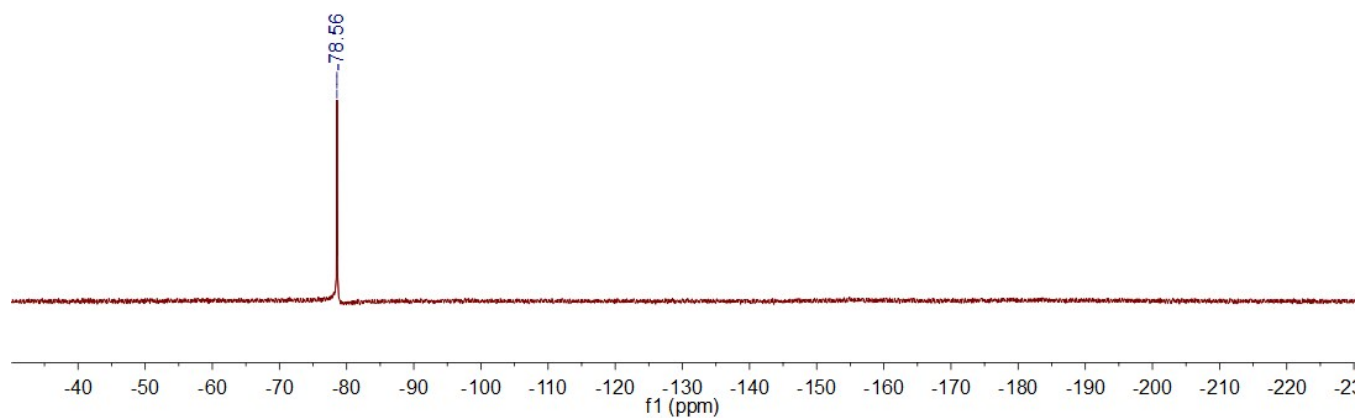

Figure S10.  $^{19}\text{F}$  NMR of 5[OTf] in  $\text{CDCl}_3$ .

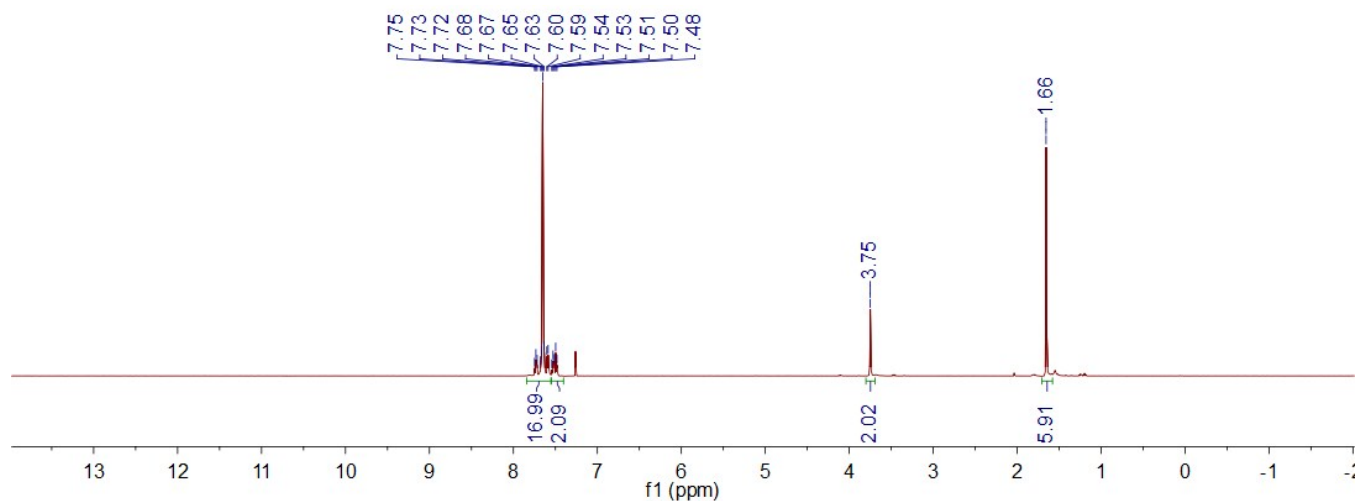

Figure S11.  $^1\text{H}$  NMR of  $6[\text{OTf}]$  in  $\text{CDCl}_3$ .

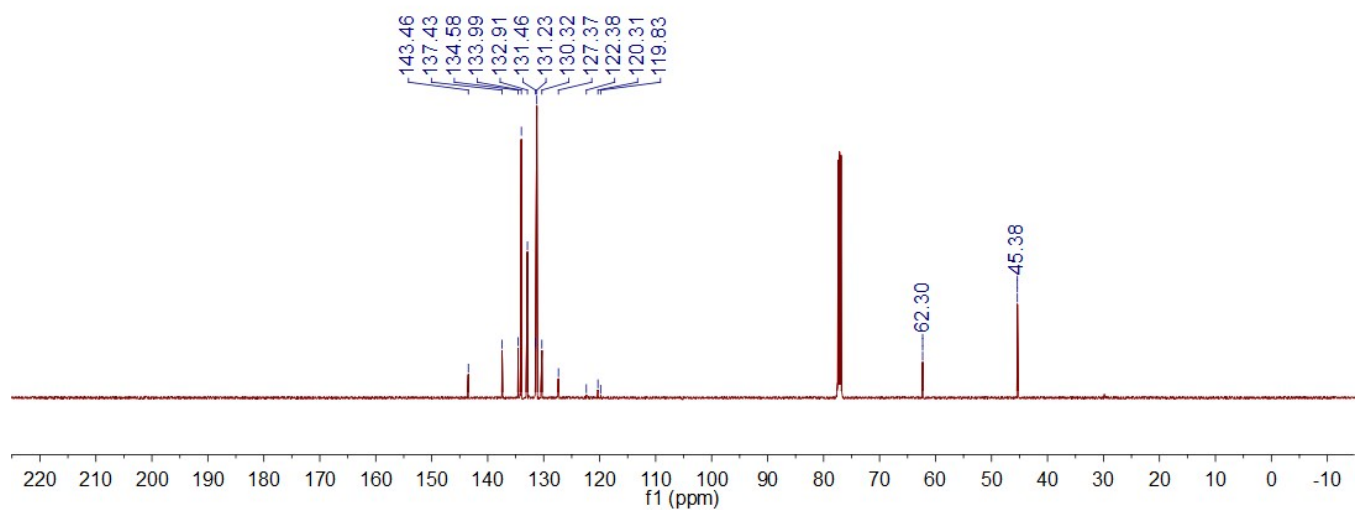

Figure S12.  $^{13}\text{C}$  NMR of  $6[\text{OTf}]$  in  $\text{CDCl}_3$ .

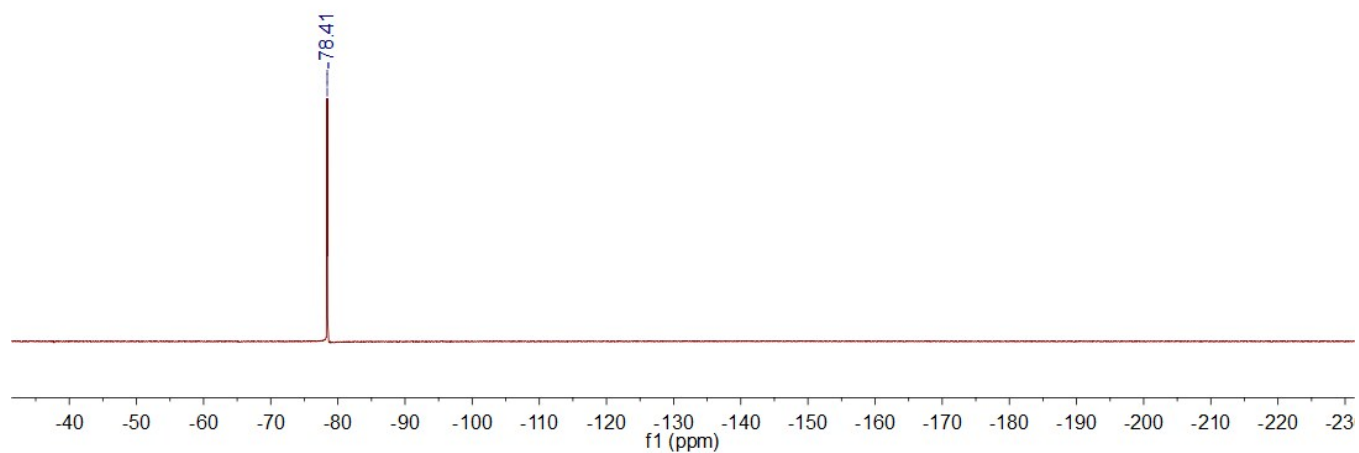

Figure S13.  $^{19}\text{F}$  NMR of  $6[\text{OTf}]$  in  $\text{CDCl}_3$ .

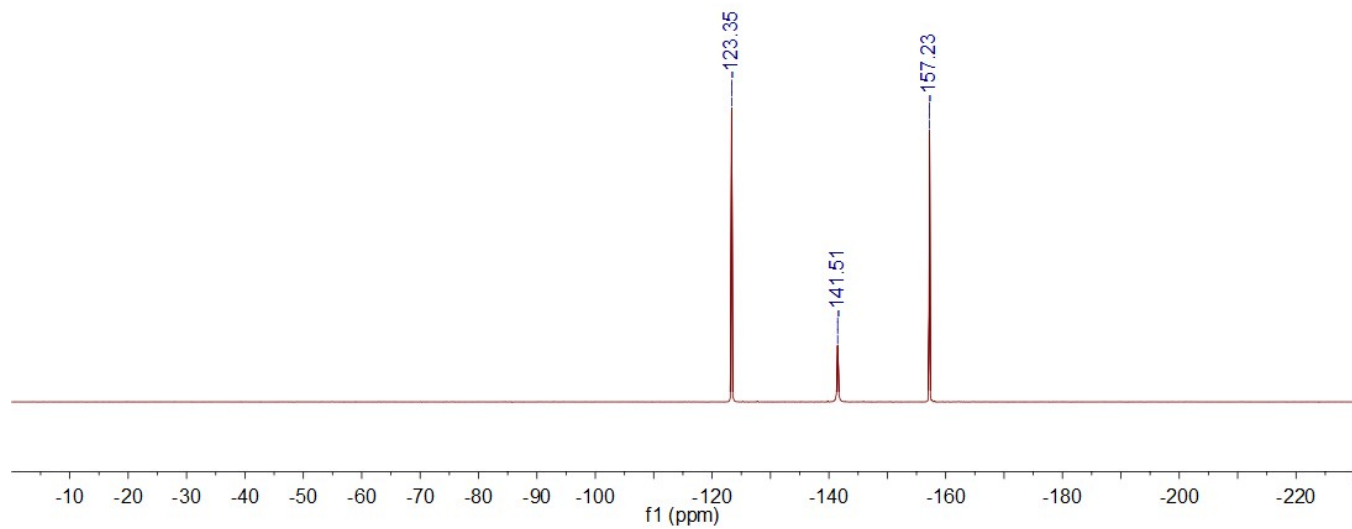

Figure S14.  $^{19}\text{F}$  NMR of  $7[\text{SbCl}_6]$  in  $\text{CD}_3\text{CN}$ .

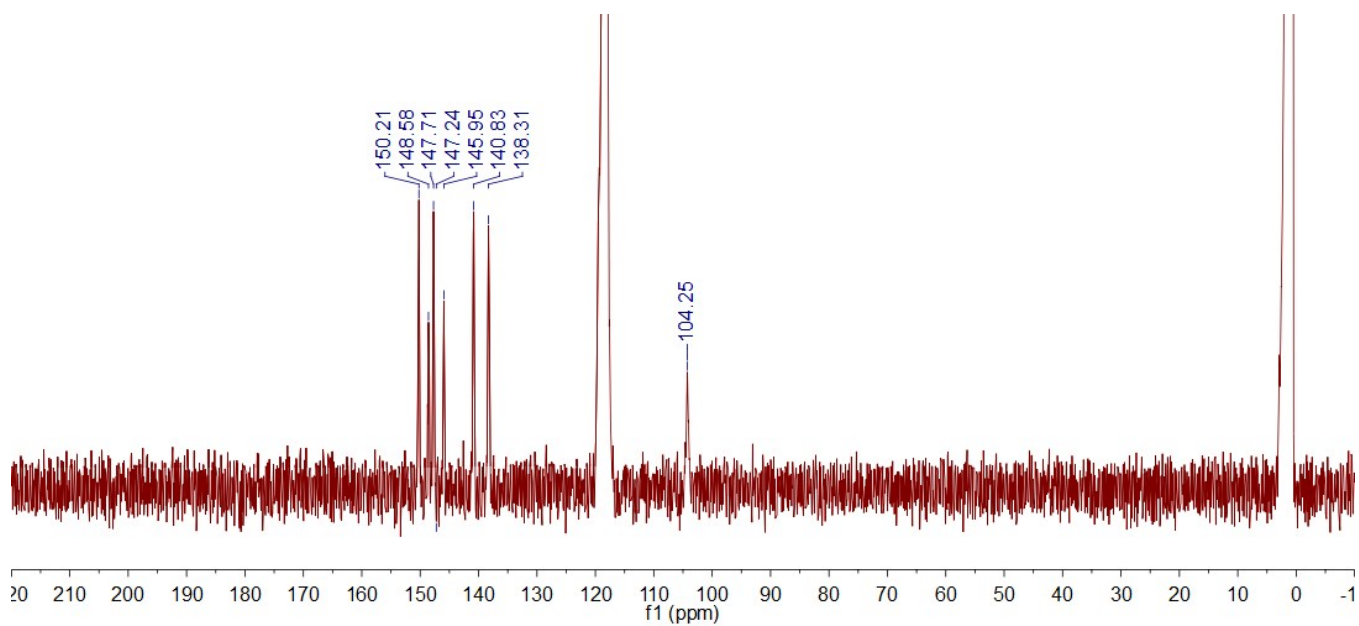

Figure S15.  $^{13}\text{C}$  NMR of  $7[\text{SbCl}_6]$  in  $\text{CD}_3\text{CN}$ .



### 1.3 Catalytic cycloaddition of oxiranes and isocyanates in NMR scale.

For each entry in Table s 1-2, the yield and selectivity are reported as the average result across multiple data points, only one representative  $^1\text{H}$  NMR spectrum for each entry is shown below.

#### 1.3.1 *In situ* NMR spectra collected during the experiments presented in Table 1.

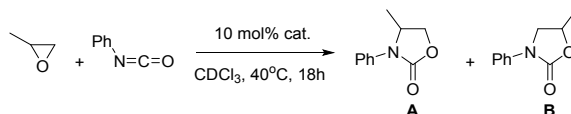

The formation of the products was monitored by  $^1\text{H}$  NMR *in situ*. The integration of the resonance at 3.0 ppm (m, 12H) of the tetrabutylammonium cation was used as a standard. The yield of the major isomer A was calculated based on the integration of two resonances: 4.4 ppm (m, 2H) and 3.8 ppm (m, 1H). The yield of the minor isomer B was calculated based on the integration of three resonances: 4.6 ppm (m, 1H), 4.0 ppm (t, 1H), and 3.5 ppm (dd, 1H). An impurity in the reaction mixture gives three resonances in the 2.5 – 5.0 ppm region, two of which overlap with isomer A: 4.7 ppm (1H), 4.4 ppm (1H) and 3.8 ppm (1H).

Additionally, no reaction took place when catalysts **5**[OTf] and **6**[OTf] were mixed with a stoichiometric amount of propylene oxide in  $\text{CDCl}_3$  over the course of 12 hours at  $40^\circ\text{C}$ . Spectra of these two stoichiometric experiments are provided below as well.

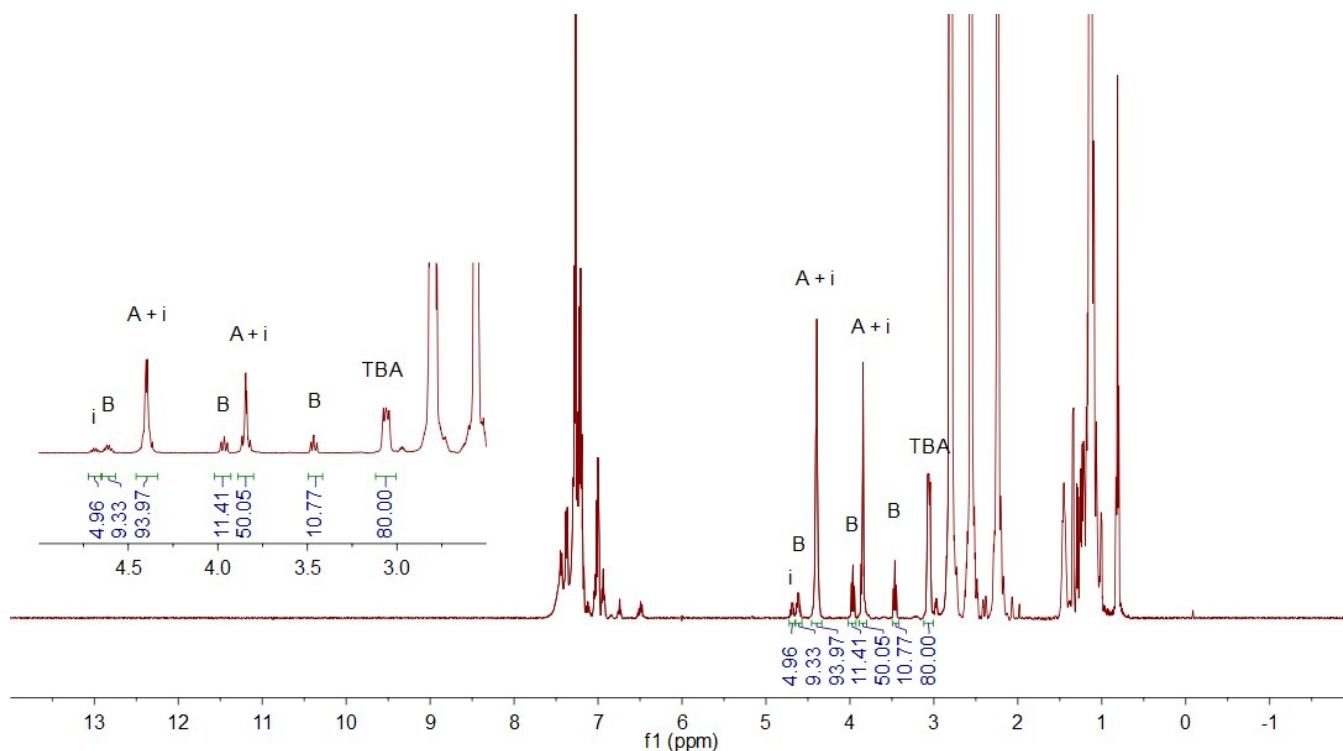

**Figure S16.** Representative  $^1\text{H}$  NMR spectrum collected during the experiment presented in Table 1, Entry 1.

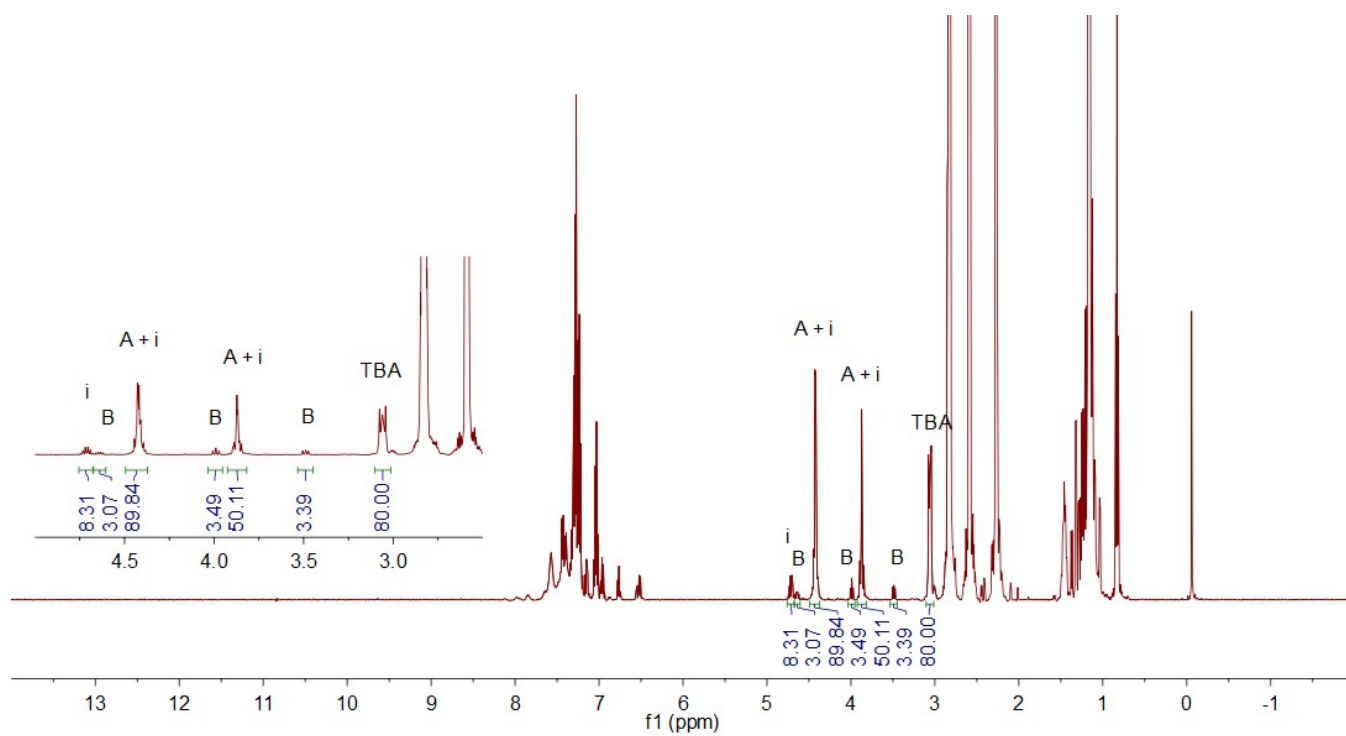

**Figure S17.** Representative <sup>1</sup>H NMR spectrum collected during the experiment presented in Table 1, Entry 2.

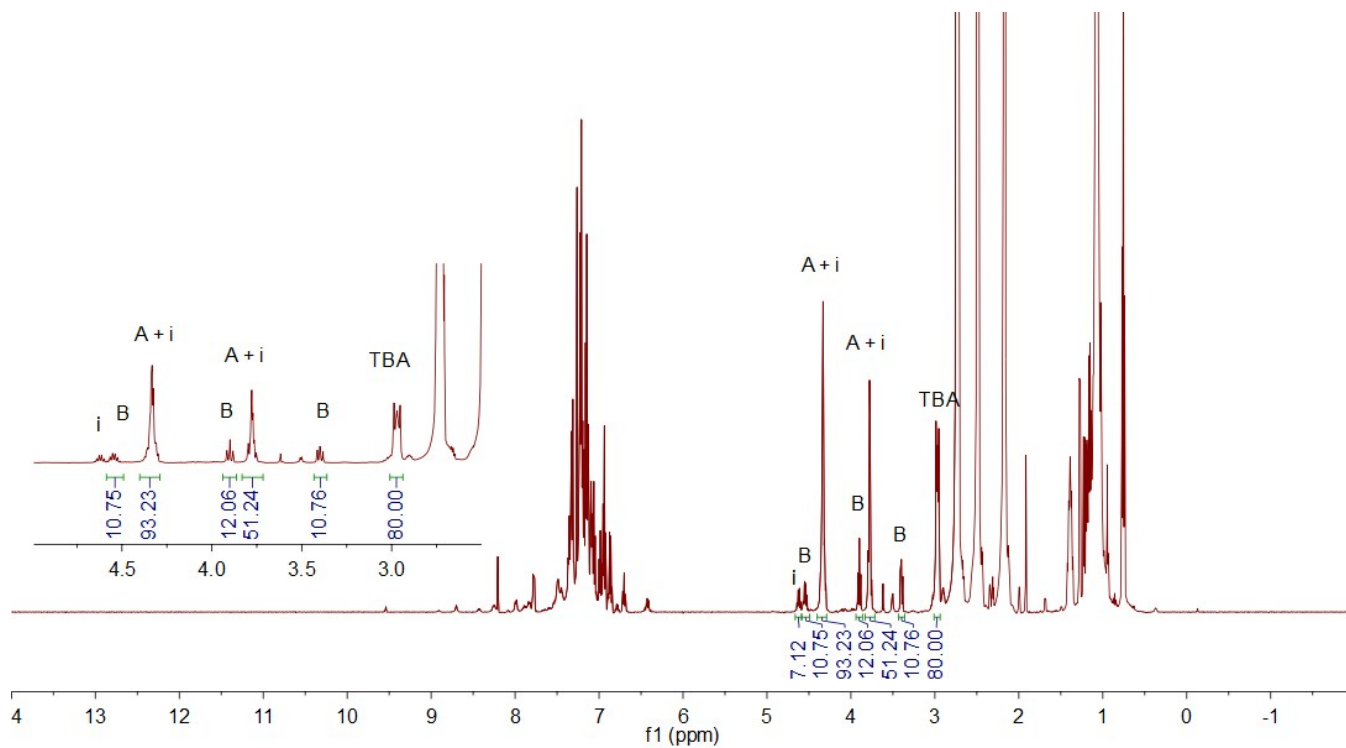

**Figure S18.** Representative <sup>1</sup>H NMR spectrum collected during the experiment presented in Table 1, Entry 3.

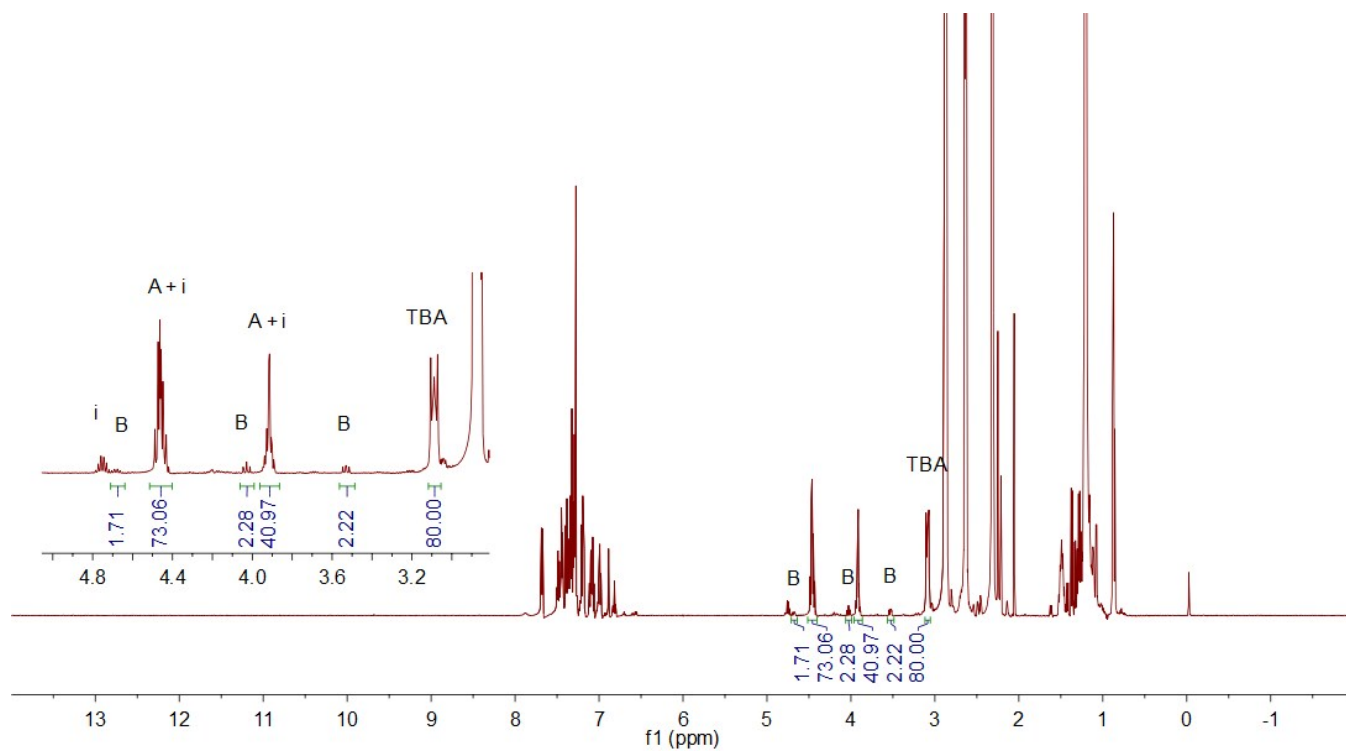

Figure S19. Representative  $^1\text{H}$  NMR spectrum collected during the experiment presented in Table 1, Entry 4.

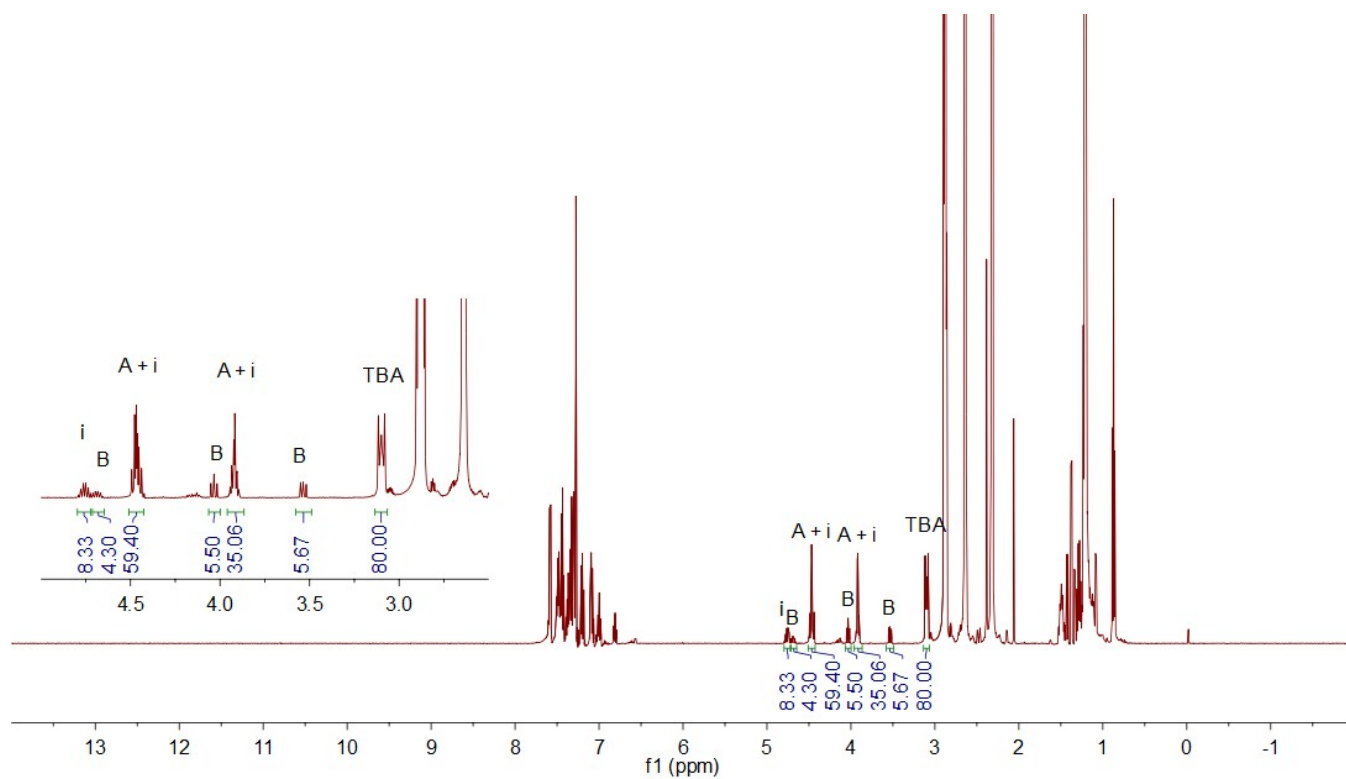

Figure S20. Representative  $^1\text{H}$  NMR spectrum collected during the experiment presented in Table 1, Entry 5.

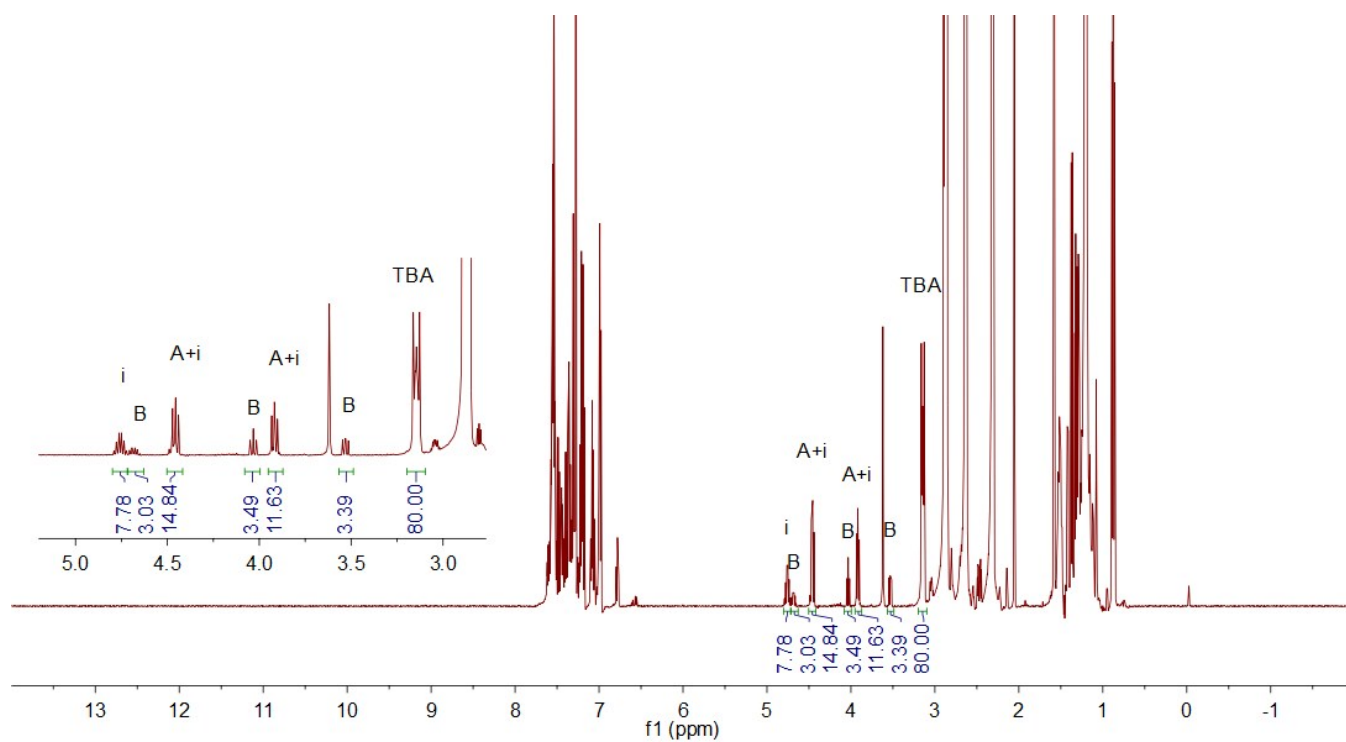

Figure S21. Representative <sup>1</sup>H NMR spectrum collected during the experiment presented in Table 1, Entry 6.

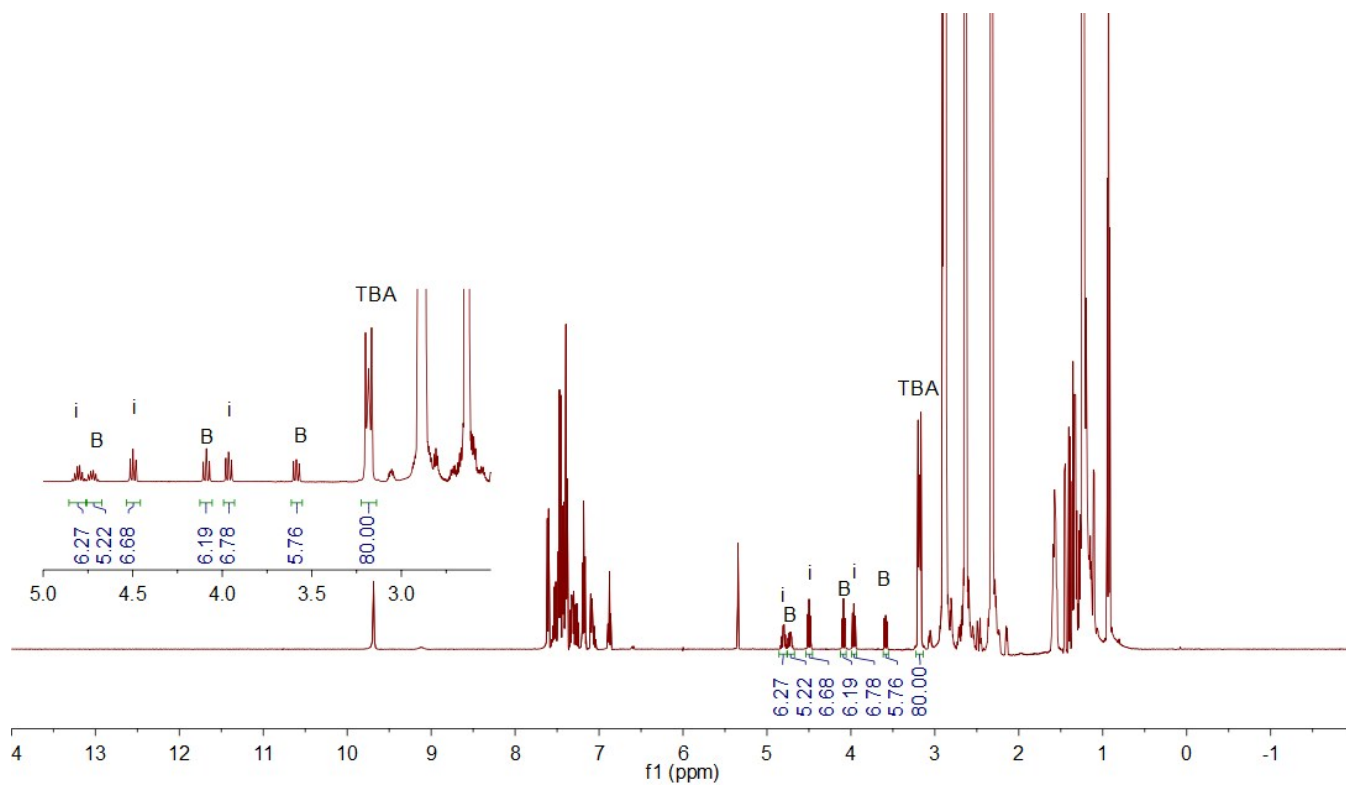

Figure S22. Representative <sup>1</sup>H NMR spectrum collected during the experiment presented in Table 1, Entry 7.

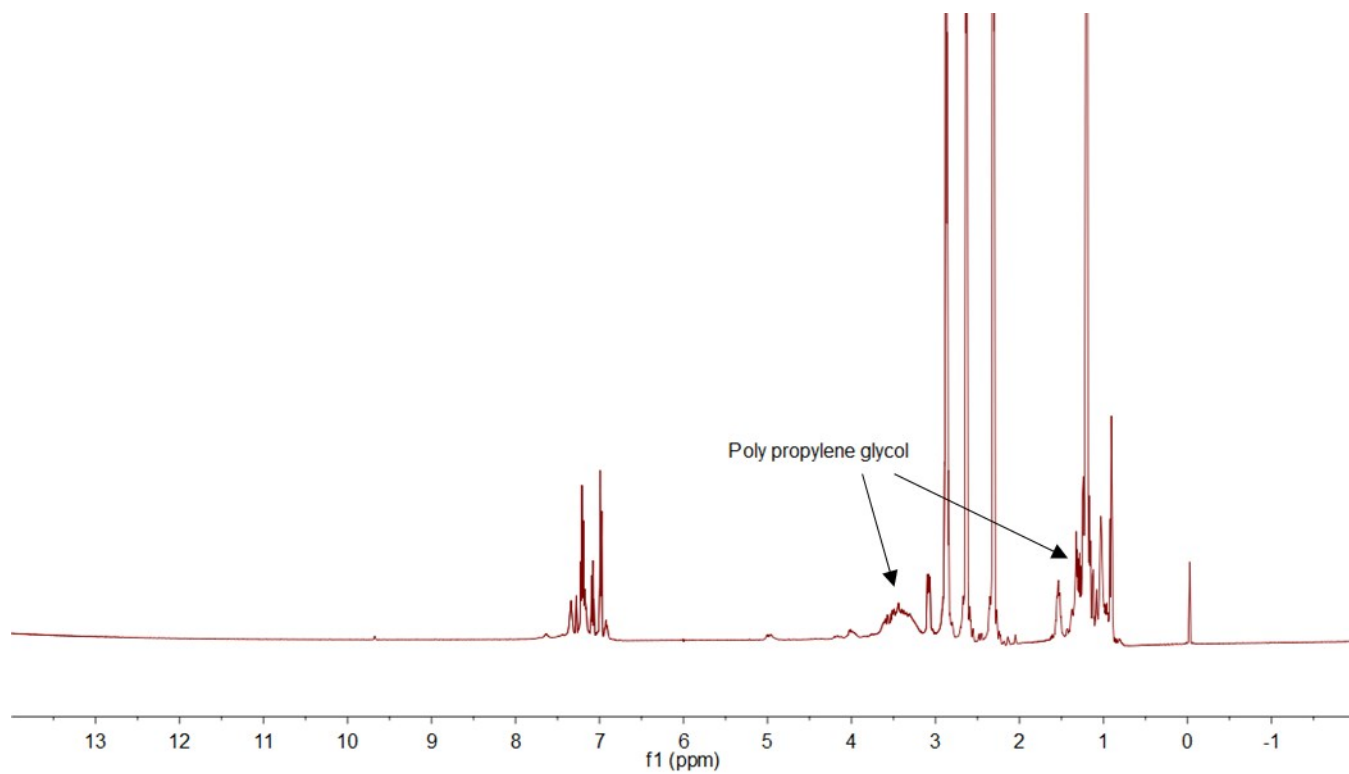

**Figure S23.** Representative  $^1\text{H}$  NMR spectrum collected during the experiment presented in Table 1, Entry 8.

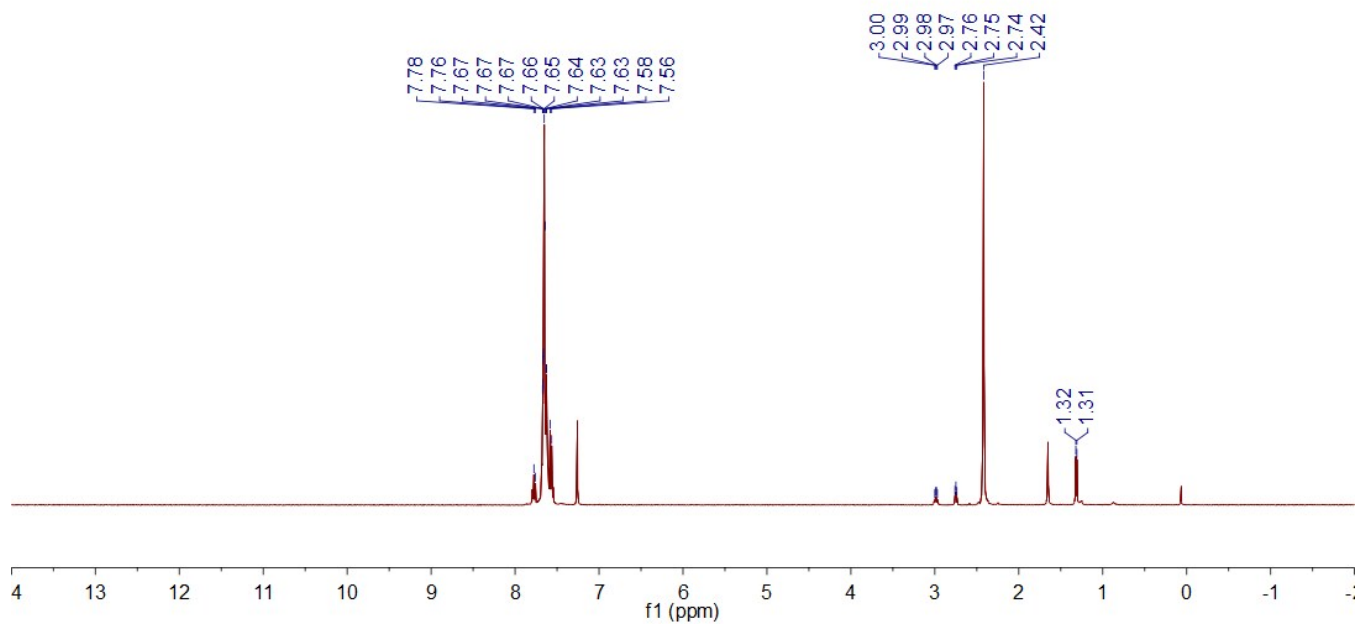

**Figure S24.**  $^1\text{H}$  NMR of the stoichiometric reaction of 5[OTf] and propylene oxide.

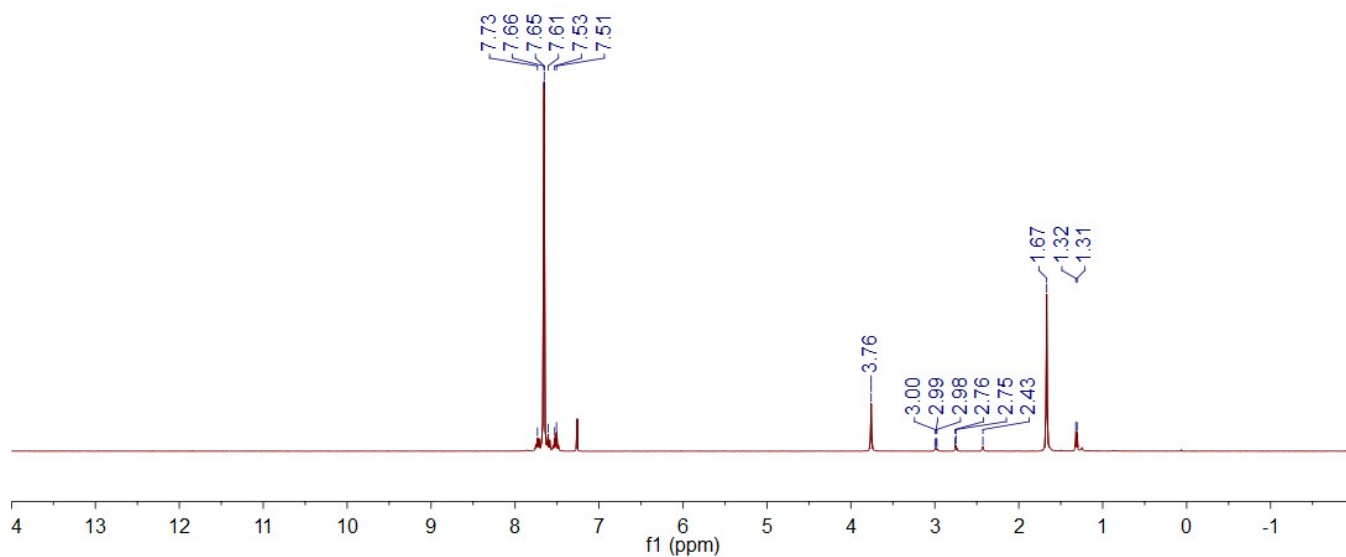

**Figure S25.**  $^1\text{H}$  NMR of the stoichiometric reaction of **6**[OTf] and propylene oxide.

1.3.2 *In situ* NMR spectra collected during the experiments presented in Table 1.

1.3.2.1 *In situ* NMR spectrum of Table 2, Entries 1-2

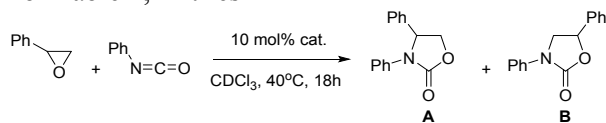

The formation of the products was monitored by  $^1\text{H}$  NMR *in situ*. The integration of the resonance at 1.5 ppm (m, 12H) of the tetrabutylammonium cation was used as a standard. The yield of the major isomer **A** was calculated based on the integration of three resonances: 5.4 ppm (dd, 1H), 4.7 ppm (t, 1H), and 4.2 ppm (dd, 1H). The yield of the minor isomer **B** was calculated based on the integration of three resonances: 5.6 ppm (dd, 1H), 4.7 ppm (t, 1H), and 4.3 ppm (dd, 1H).

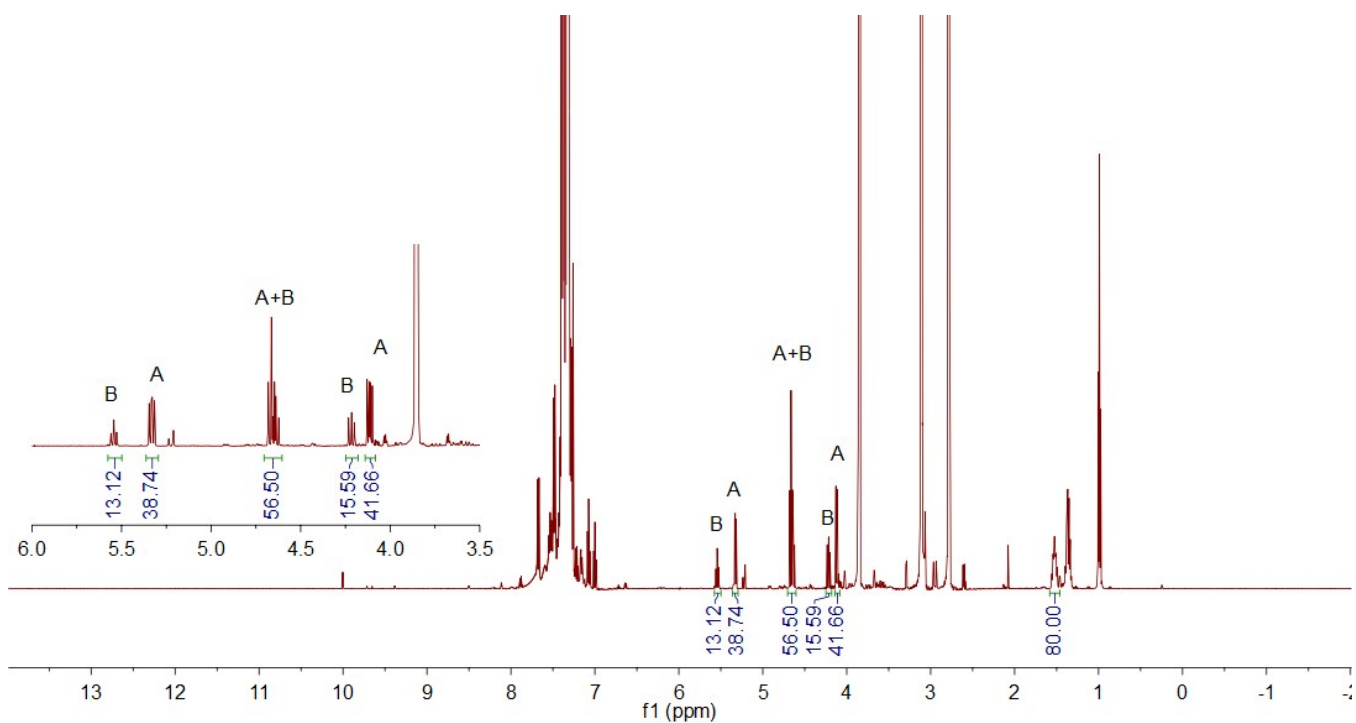

Figure S26. Representative <sup>1</sup>H NMR spectrum collected during the experiment presented in Table 2, Entry 1.

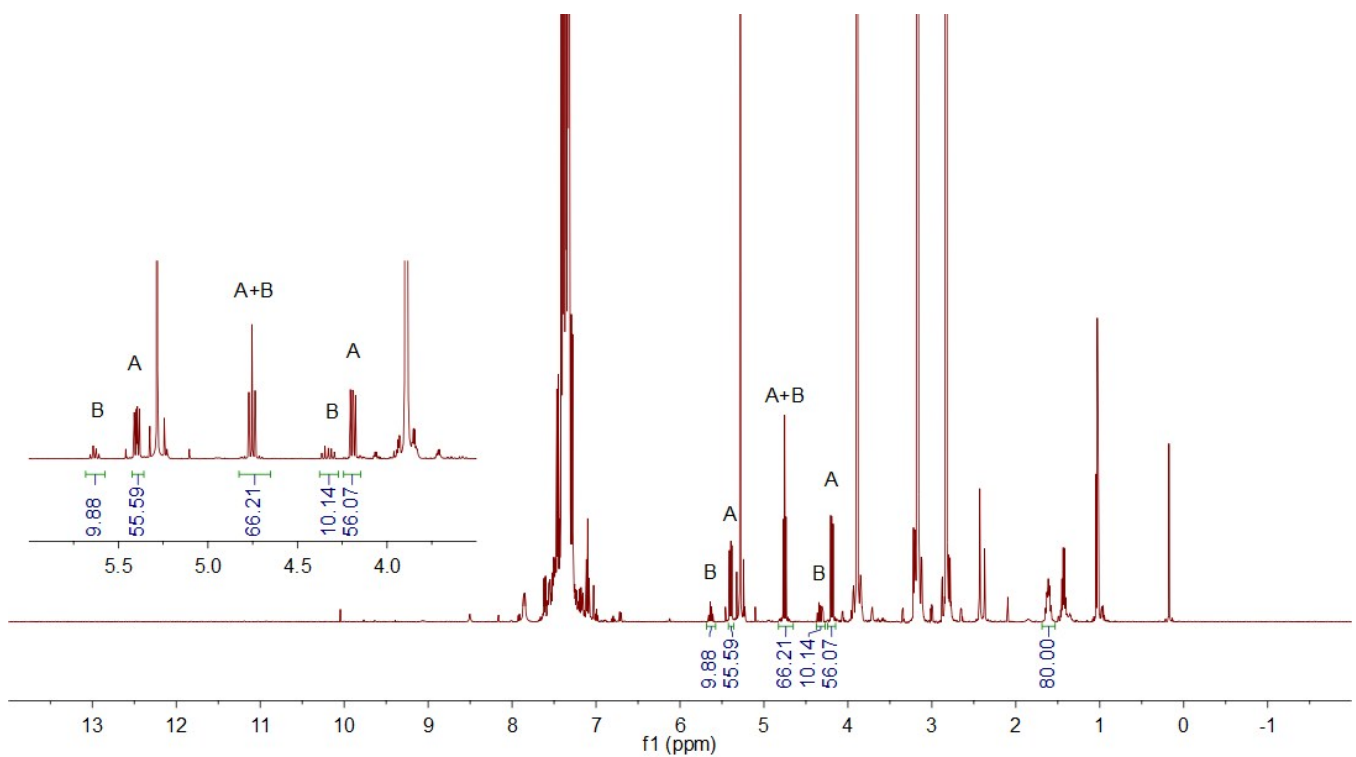

Figure S27. Representative <sup>1</sup>H NMR spectrum collected during the experiment presented in Table 2, Entry 2.

### 1.3.2.2 *In situ* NMR spectrum of Table 2, Entries 3-4

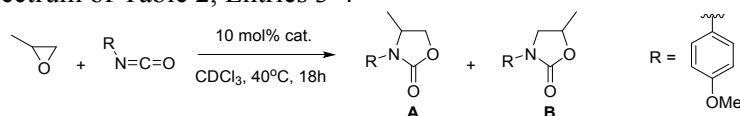

The formation of the products was monitored by  $^1\text{H}$  NMR *in situ*. The integration of the resonance at 3.0 ppm (m, 12H) of the tetrabutylammonium cation was used as a standard. The yield of the major isomer A was calculated based on the integration of three resonances: 4.5 ppm (t, 1H), 4.4 ppm (m, 1H), and 3.9 ppm (dd, 1H). The yield of the minor isomer B was calculated based on the integration of three resonances: 4.7 ppm (m, 1H), 4.0 ppm (t, 1H), and 3.5 ppm (dd, 1H). An impurity in the reaction mixture gives three resonances in the 2.5 – 5.0 ppm region, one of which overlaps with isomer A: 4.8 ppm (m, 1H), 4.5 ppm (t, 1H) and 3.9 ppm (dd, 1H).

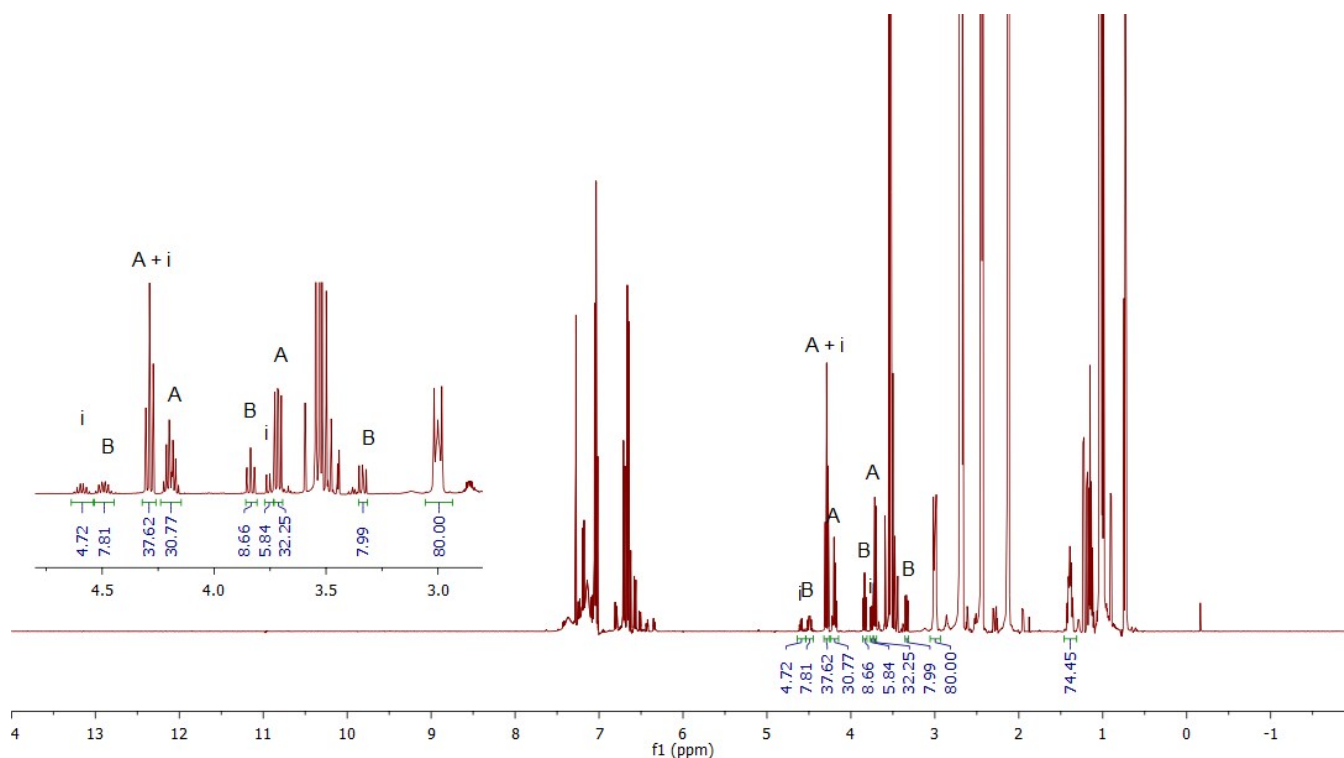

**Figure S28.** Representative  $^1\text{H}$  NMR spectrum collected during the experiment presented in Table 2, Entry 3.



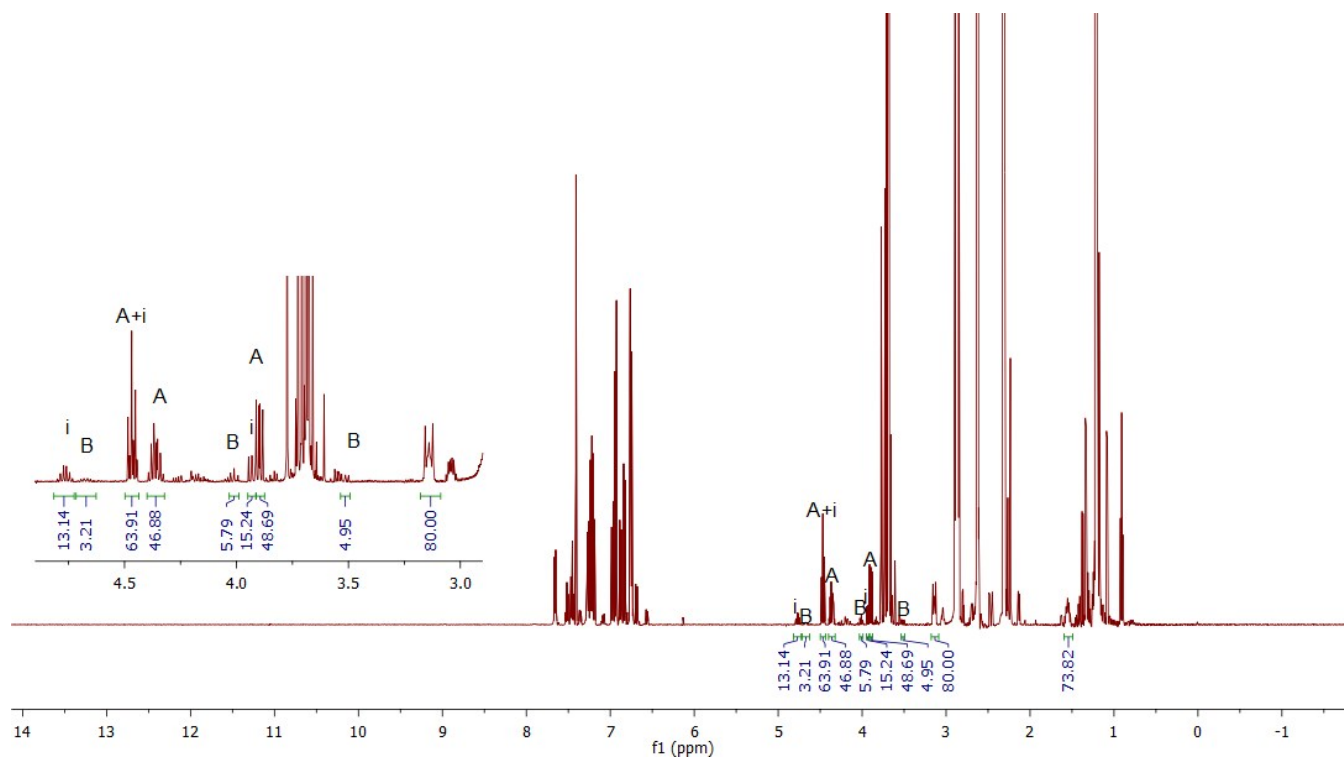

**Figure S29.** Representative  $^1\text{H}$  NMR spectrum collected during the experiment presented in Table 2, Entry 4.

### 1.3.2.3 *In situ* NMR spectrum of Table 2, Entries 5-6

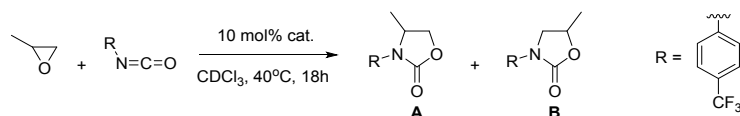

The formation of the products was monitored by  $^1\text{H}$  NMR *in situ*. The integration of the resonance at 3.0 ppm (m, 12H) of the tetrabutylammonium cation was used as a standard. The yield of the major isomer A was calculated based on the integration of three resonances: 4.4 ppm (m, 1H), 4.3 ppm (t, 1H), and 3.8 ppm (dd, 1H). The yield of the minor isomer B was calculated based on the integration of three resonances: 4.6 ppm (m, 1H), 4.0 ppm (t, 1H), and 3.4 ppm (dd, 1H).

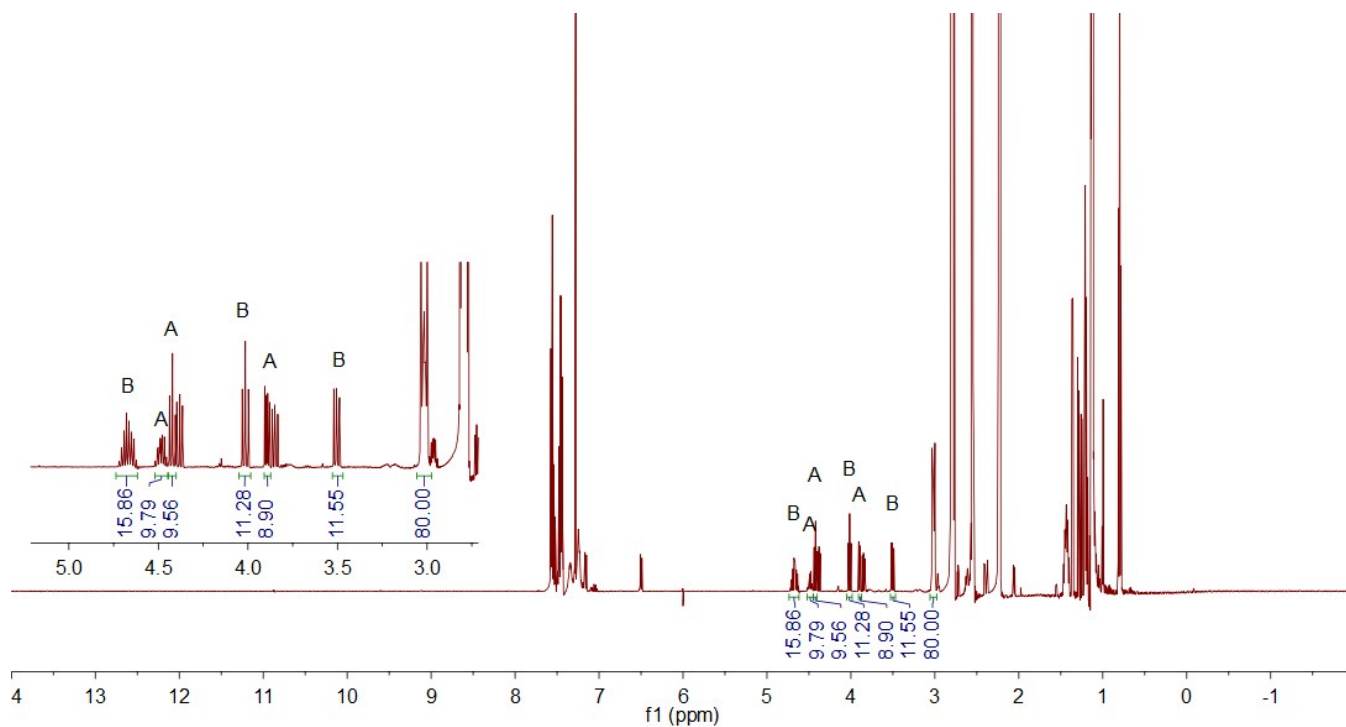

**Figure S30.** Representative  $^1\text{H}$  NMR spectrum collected during the experiment presented in Table 2, Entry 5.

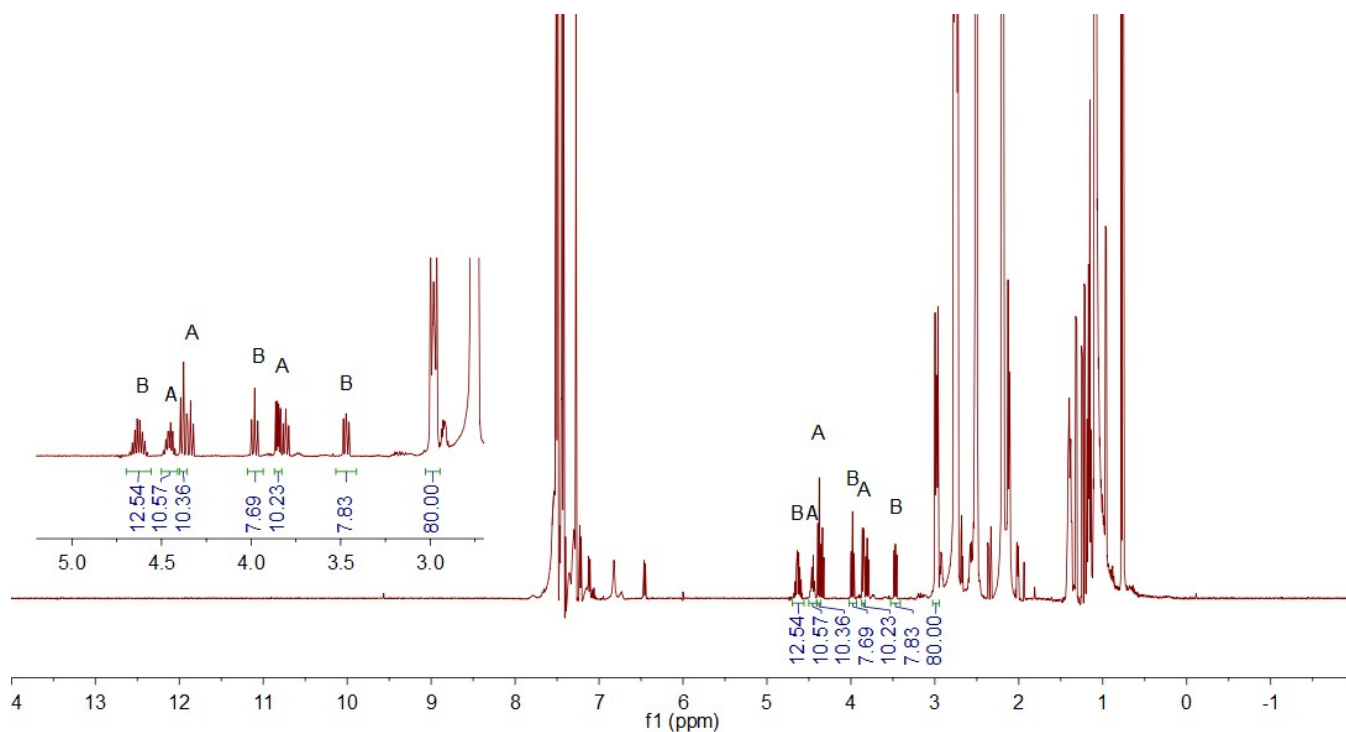

**Figure S31.** Representative  $^1\text{H}$  NMR spectrum collected during the experiment presented in Table 2, Entry 6.

#### 1.4 Catalytic cycloaddition of propylene oxide and phenyl isocyanate

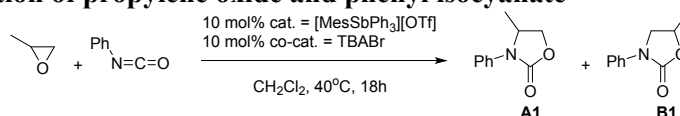

To a stirred solution containing [MesSbPh<sub>3</sub>][OTf] (150 mg, 0.24 mmol, 0.1 eq) and TBABr (77 mg, 0.24 mmol, 0.1 eq) in CH<sub>2</sub>Cl<sub>2</sub> (5 mL), was added propylene oxide (2.5 mL, 36 mmol, 15 eq) and phenyl isocyanate (286 mg, 2.4 mmol, 1 eq). The reaction was stirred in a 40 °C bath for 18 h under N<sub>2</sub>. An aliquot was taken from the reaction mixture and the yield of the two regioisomeric oxazolidinones was determined by <sup>1</sup>H NMR spectroscopy. The crude reaction mixture was subjected to flash chromatography over silica gel (3% ethyl acetate in hexanes). The third major fraction (very close to the second one) was collected washed with diethyl ether to afford product 5-methyl-3-phenyl-2-oxazolidinone (**B1**) as white powder (16 mg, 4%), and the fourth major fraction was collected to afford product 4-methyl-3-phenyl-2-oxazolidinone (**A1**) as colorless oil (170 mg, 40%).

4-methyl-3-phenyl-2-oxazolidinone (**A1**): <sup>1</sup>H NMR (500 MHz, CDCl<sub>3</sub>) δ = 7.43 – 7.35 (m, 4H), 7.20 – 7.15 (m, 1H), 4.59 – 4.45 (m, 2H), 4.00 (dd, *J* = 7.8, 5.3, 1H), 1.30 (d, *J* = 5.9, 3H). <sup>13</sup>C NMR (100 MHz, CDCl<sub>3</sub>) δ = 155.82 (s), 136.60 (s), 129.27 (s), 125.32 (s), 122.04 (s), 68.76 (s), 52.42 (s), 18.54 (s). Spectral data are in accord with the previous report.<sup>2</sup>

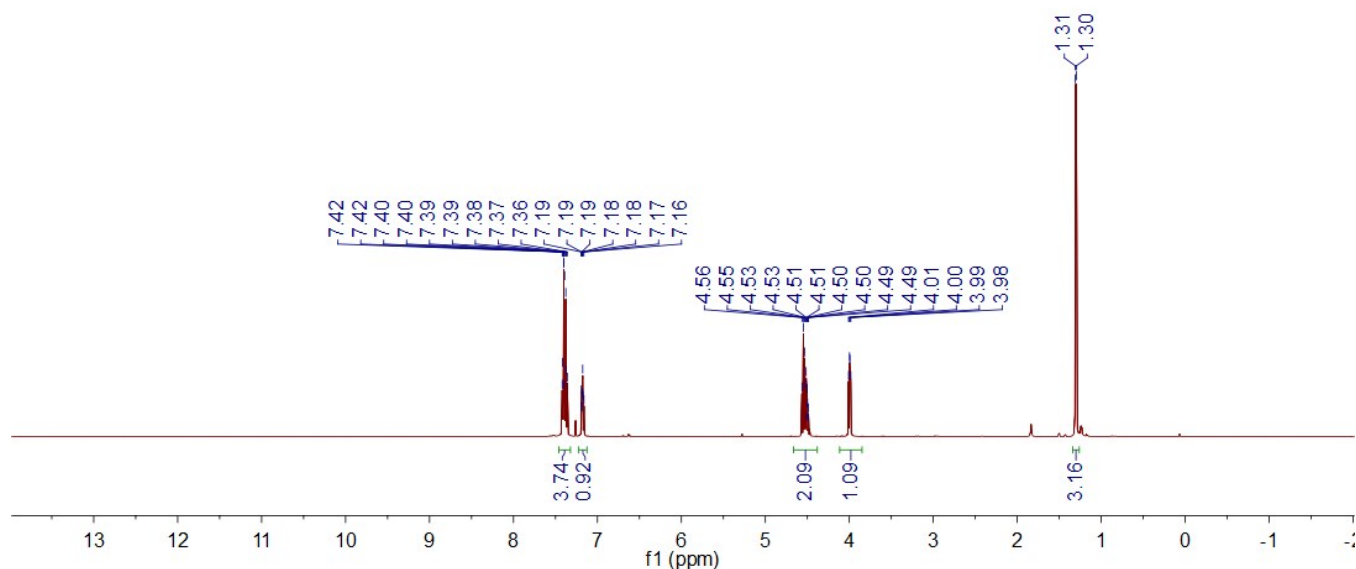

**Figure S32.** <sup>1</sup>H NMR of 4-methyl-3-phenyl-2-oxazolidinone (**A1**) in CDCl<sub>3</sub>.

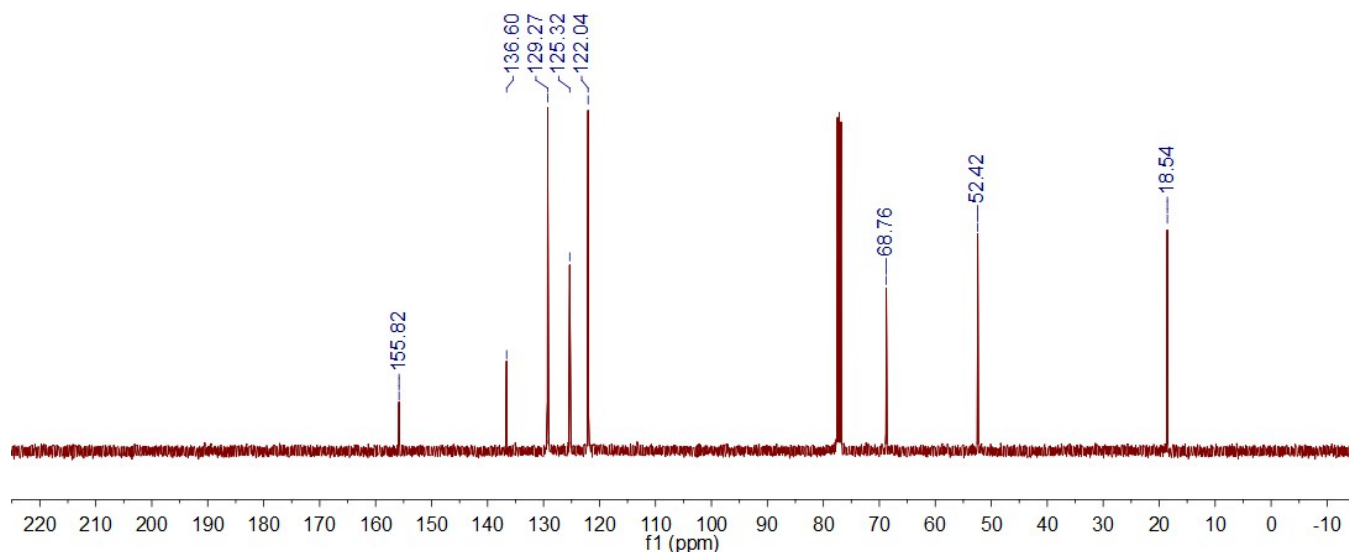

**Figure S33.**  $^{13}\text{C}$  NMR of 4-methyl-3-phenyl-2-oxazolidinone (**A1**) in  $\text{CDCl}_3$ .

5-methyl-3-phenyl-2-oxazolidinone (**B1**):  $^1\text{H}$  NMR (500 MHz,  $\text{CDCl}_3$ )  $\delta$  = 7.57 – 7.50 (m, 2H), 7.41 – 7.35 (m, 2H), 7.17 – 7.11 (m, 1H), 4.85 – 4.74 (m, 1H), 4.12 (t,  $J$  = 8.4, 1H), 3.63 (dd,  $J$  = 8.6, 7.1, 1H), 1.54 (d,  $J$  = 6.3, 1H).  $^{13}\text{C}$  NMR (126 MHz,  $\text{CDCl}_3$ )  $\delta$  = 155.01 (s), 138.51 (s), 129.18 (s), 124.09 (s), 118.31 (s), 69.66 (s), 52.03 (s), 20.87 (s). Spectral data are in accord with the previous report.<sup>2</sup>

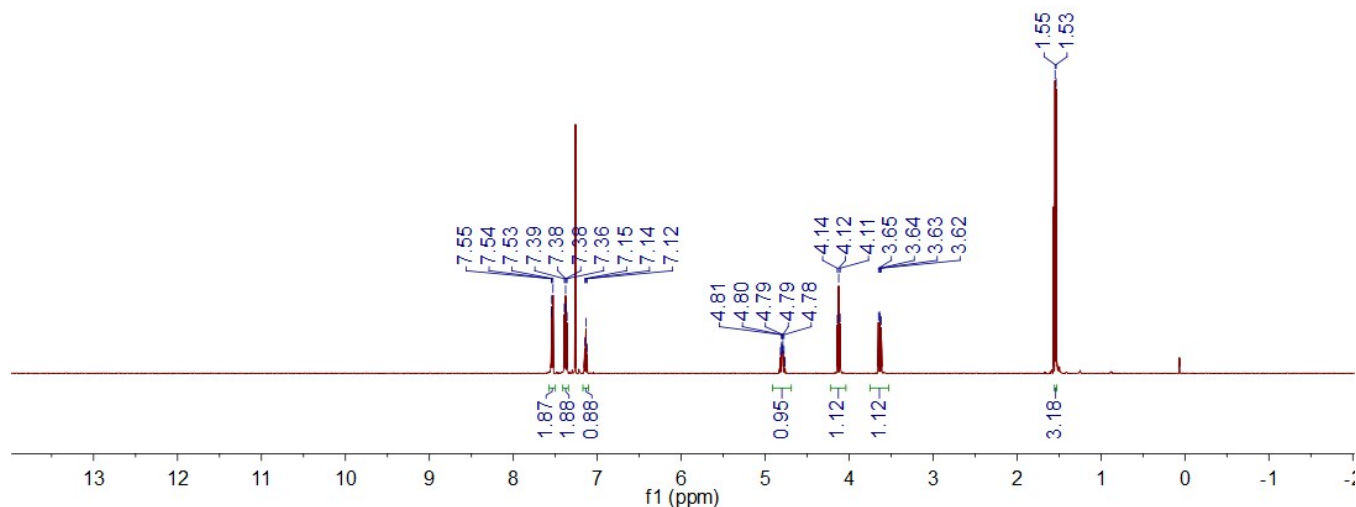

**Figure S34.**  $^1\text{H}$  NMR of 5-methyl-3-phenyl-2-oxazolidinone (**B1**) in  $\text{CDCl}_3$ .

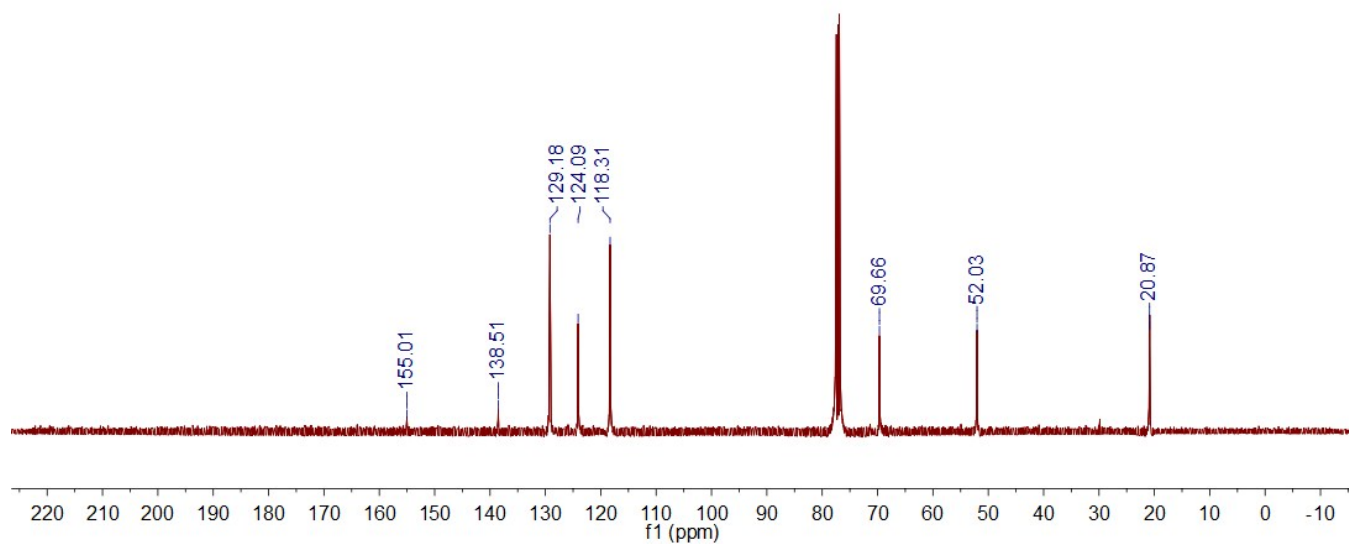

**Figure S35.** <sup>13</sup>C NMR of 5-methyl-3-phenyl-2-oxazolidinone (**B1**) in CDCl<sub>3</sub>.

## 1.5 Catalytic cycloaddition of styrene oxide and phenyl isocyanate

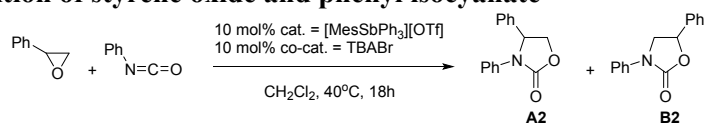

To a stirred solution of catalyst [MesSbPh<sub>3</sub>][OTf] (125 mg, 0.20 mmol, 0.1 eq), co-catalyst TBABr (65 mg, 0.20 mmol, 0.1 eq) in CH<sub>2</sub>Cl<sub>2</sub> (5 mL) was added styrene oxide (3.5 mL, 30 mmol, 15 eq) and phenyl isocyanate (243 mg, 2.0 mmol, 1 eq). The reaction was stirred in a 40 °C bath for 18 h under N<sub>2</sub>. An aliquot was taken from the reaction mixture and the yield of two regioisomeric oxazolidinones was determined by <sup>1</sup>H NMR spectroscopy. The reaction mixture was treated to flash chromatography over silica gel (gradient 0-50% ethyl acetate in hexanes) and the third major fraction was collected and treated again to flash chromatography over silica gel (gradient 5-20% ethyl acetate in hexanes). The third major fraction was collected and recrystallized with diethyl ether to afford product 3,5-diphenyl-2-oxazolidinone (**B2**) as white powder (16 mg, 3%), and the fourth major fraction was collected and washed with hexanes to afford product 3,4-diphenyl-2-oxazolidinone (**A2**) as white powder (210 mg, 43%).

3,4-diphenyl-2-oxazolidinone (**A2**): <sup>1</sup>H NMR (500 MHz, CDCl<sub>3</sub>) δ = 7.43 – 7.35 (m, 4H), 7.35 – 7.30 (m, 3H), 7.30 – 7.25 (m, 2H), 7.11 – 7.06 (m, 1H), 5.42 (dd, *J* = 8.7, 6.0, 1H), 4.80 (t, *J* = 8.7, 1H), 4.22 (dd, *J* = 8.7, 6.0, 1H). <sup>13</sup>C NMR (126 MHz, CDCl<sub>3</sub>) δ = 156.08 (s), 138.37 (s), 137.13 (s), 129.52 (s), 129.04 (s), 128.97 (s), 126.37 (s), 124.83 (s), 120.98 (s), 69.95 (s), 60.85 (s). Spectral data are in accord with the previous report.<sup>2</sup>

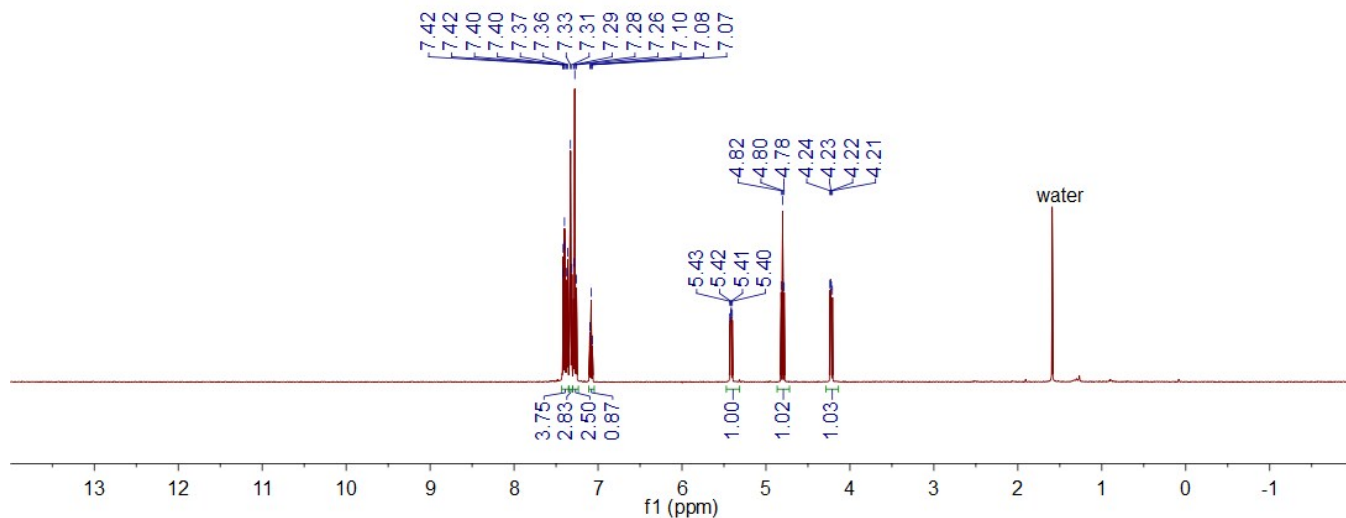

Figure S36. <sup>1</sup>H NMR of 3,4-diphenyl-2-oxazolidinone (**A2**) in CDCl<sub>3</sub>.

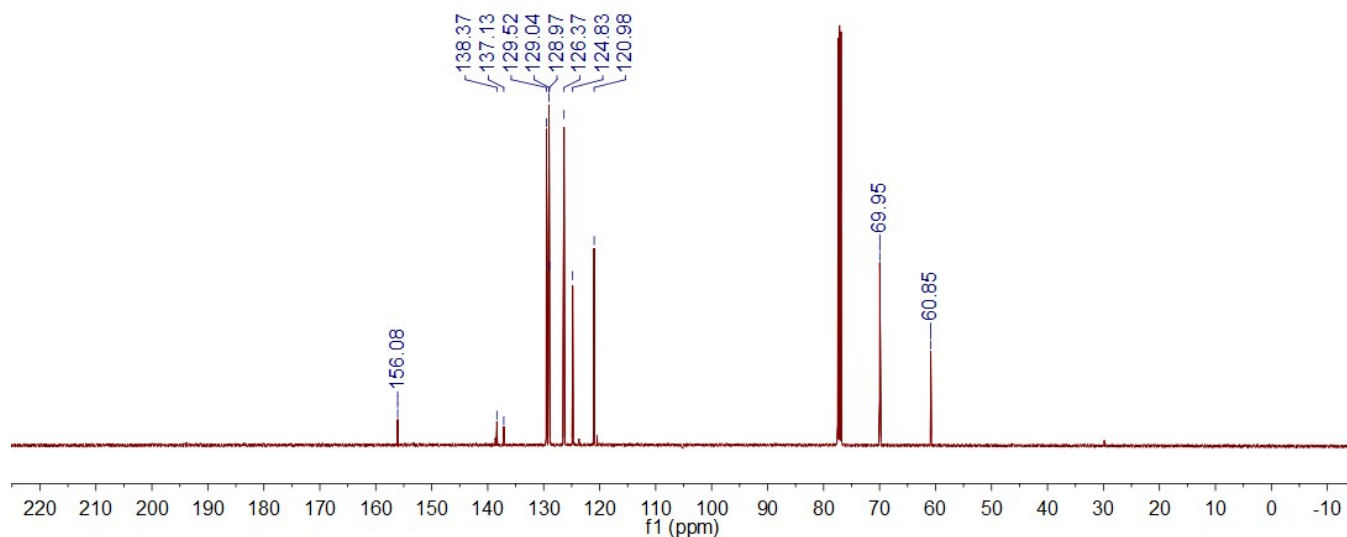

**Figure S37.**  $^{13}\text{C}$  NMR of 3,4-diphenyl-2-oxazolidinone (**A2**) in  $\text{CDCl}_3$ .

3,5-diphenyl-2-oxazolidinone (**B2**):  $^1\text{H}$  NMR (500 MHz,  $\text{CDCl}_3$ )  $\delta = 7.58 - 7.52$  (m, 2H), 7.48 – 7.36 (m, 7H), 7.19 – 7.12 (m, 1H), 5.65 (dd,  $J = 8.8, 7.5$ , 1H), 4.39 (t,  $J = 8.8$ , 1H), 3.98 (dd,  $J = 8.8, 7.5$ , 1H).  $^{13}\text{C}$  NMR (126 MHz,  $\text{CDCl}_3$ )  $\delta = 154.85$  (s), 138.27 (s), 138.24 (s), 129.28 (s), 129.27 (s), 129.20 (s), 125.83 (s), 124.35 (s), 118.45 (s), 74.19 (s), 52.88 (s). Spectral data are in accord with the previous report.<sup>2</sup>

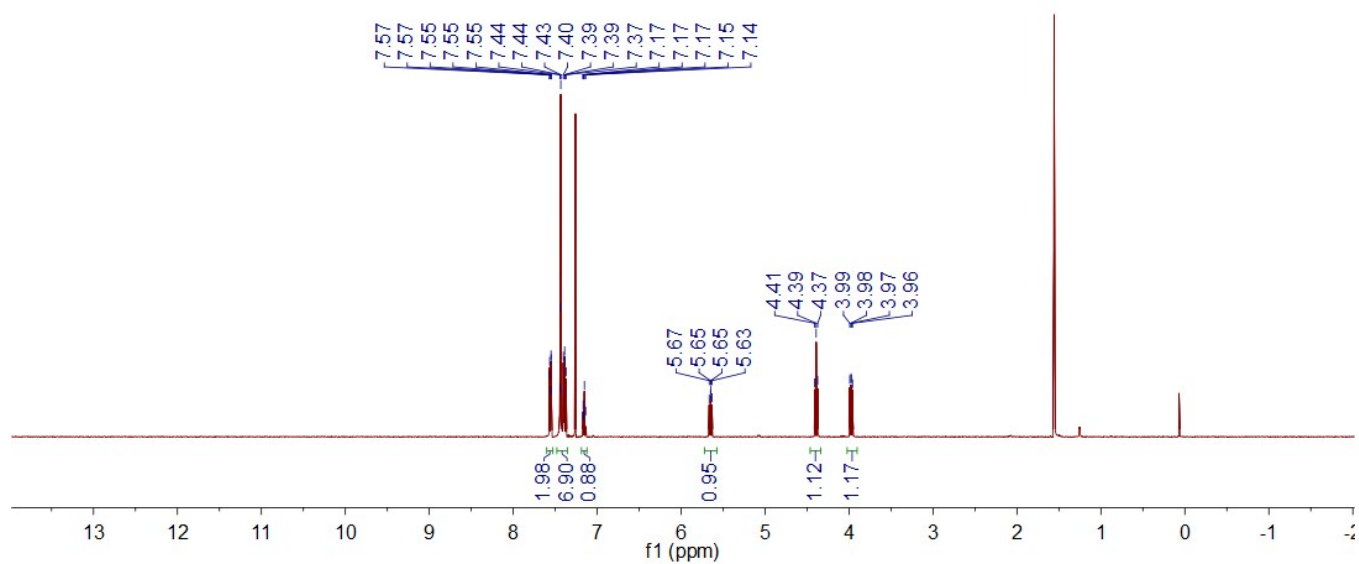

**Figure S38.**  $^1\text{H}$  NMR of 3,5-diphenyl-2-oxazolidinone (**B2**) in  $\text{CDCl}_3$ .

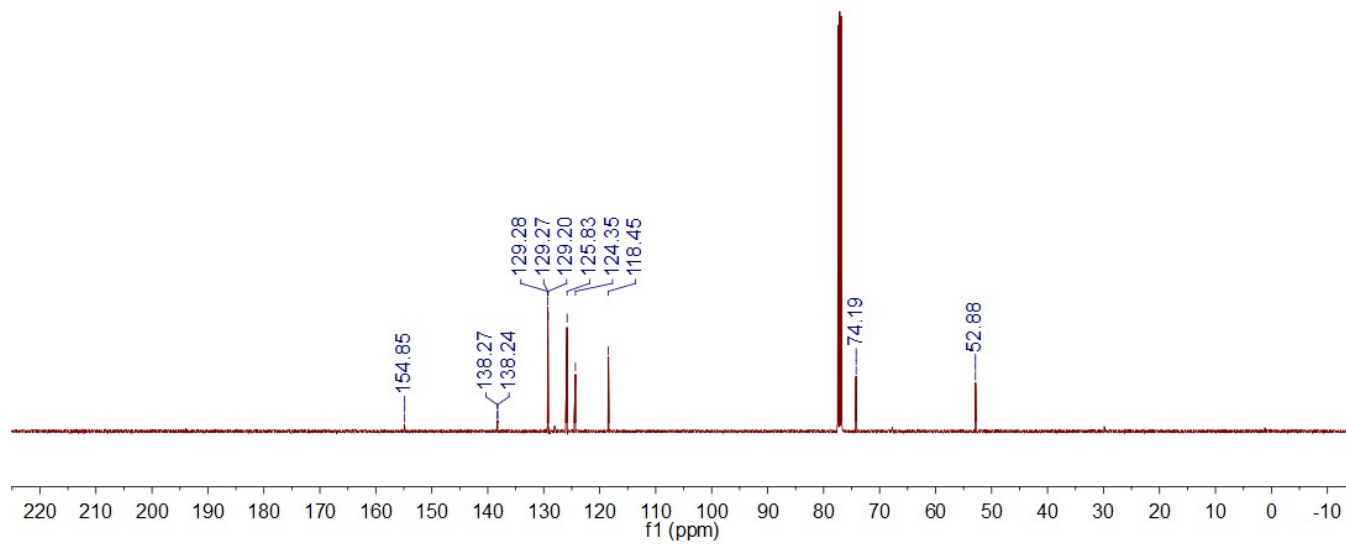

**Figure S39.**  $^{13}\text{C}$  NMR of 3,5-diphenyl-2-oxazolidinone (**B2**) in  $\text{CDCl}_3$ .



## 2 Crystallographic measurements.

### 2.1 1-Naphthyltriphenylstibonium triflate (2[OTf])

**Table S1.** Crystal data, data collection, and structure refinement for 2[OTf]

|                                   |                                                                                                    |
|-----------------------------------|----------------------------------------------------------------------------------------------------|
| Empirical formula                 | C <sub>29</sub> H <sub>22</sub> F <sub>3</sub> O <sub>3</sub> S Sb                                 |
| Formula weight                    | 629.27                                                                                             |
| Temperature                       | 110 K                                                                                              |
| Wavelength                        | 0.71073 Å                                                                                          |
| Crystal system                    | Monoclinic                                                                                         |
| Space group                       | C 1 2/c 1                                                                                          |
| Unit cell dimensions              | a = 14.848(7) Å<br>b = 14.208(7) Å<br>c = 24.673(17) Å<br>α = 90°.<br>β = 102.698(9)°.<br>γ = 90°. |
| Volume                            | 5078(5) Å <sup>3</sup>                                                                             |
| Z                                 | 8                                                                                                  |
| Density (calculated)              | 1.646 Mg/m <sup>3</sup>                                                                            |
| Absorption coefficient            | 1.221 mm <sup>-1</sup>                                                                             |
| F(000)                            | 2512                                                                                               |
| Crystal size                      | 0.42 x 0.3 x 0.1 mm <sup>3</sup>                                                                   |
| Theta range for data collection   | 2.296 to 27.447°.                                                                                  |
| Index ranges                      | -18 < h < 18, -18 < k < 18, -31 < l < 31                                                           |
| Reflections collected             | 78867                                                                                              |
| Independent reflections           | 5413 [R(int) = 0.0800]                                                                             |
| Completeness to theta = 25.242°   | 99.9 %                                                                                             |
| Absorption correction             | Semi-empirical from equivalents                                                                    |
| Max. and min. transmission        | 0.7455 and 0.5966                                                                                  |
| Refinement method                 | Full-matrix least-squares on F <sup>2</sup>                                                        |
| Data / restraints / parameters    | 5413 / 121 / 437                                                                                   |
| Goodness-of-fit on F <sub>2</sub> | 1.025                                                                                              |
| Final R indices [I > 2σ(I)]       | R <sub>1</sub> <sup>a</sup> = 0.0400, wR <sub>2</sub> <sup>b</sup> = 0.0761                        |
| R indices (all data)              | R <sub>1</sub> = 0.0769, wR <sub>2</sub> = 0.0904                                                  |
| Extinction coefficient            | n/a                                                                                                |
| Largest diff. peak and hole       | 0.575 and -0.538 e.Å <sup>-3</sup>                                                                 |

<sup>a</sup>R<sub>1</sub> = Σ||F<sub>o</sub>| - |F<sub>c</sub>|| / Σ|F<sub>o</sub>|. <sup>b</sup>wR<sub>2</sub> = ([w(F<sub>o</sub><sup>2</sup> - F<sub>c</sub><sup>2</sup>)<sup>2</sup>] / [Σw(F<sub>o</sub><sup>2</sup>)<sup>2</sup>])<sup>1/2</sup>; w = 1/[σ<sup>2</sup>(F<sub>o</sub><sup>2</sup>) + (ap)<sup>2</sup> + bp]; p = (F<sub>o</sub><sup>2</sup> + 2F<sub>c</sub><sup>2</sup>)/3 with a = 0.02430 and b = 20.4903.

## 2.2 [MesSbPh<sub>3</sub>][OTf] (4[OTf])

**Table S2.** Crystal data, data collection, and structure refinement for 4[OTf]

|                                   |                                                                                                     |
|-----------------------------------|-----------------------------------------------------------------------------------------------------|
| Empirical formula                 | C <sub>28</sub> H <sub>26</sub> F <sub>3</sub> O <sub>3</sub> S Sb                                  |
| Formula weight                    | 621.30                                                                                              |
| Temperature                       | 110 K                                                                                               |
| Wavelength                        | 0.71073 Å                                                                                           |
| Crystal system                    | Monoclinic                                                                                          |
| Space group                       | <i>P</i> 1 2 <sub>1</sub> /n 1                                                                      |
| Unit cell dimensions              | a = 11.4672(4) Å<br>b = 19.4493(8) Å<br>c = 11.7980(5) Å<br>α = 90°.<br>β = 95.029(2)°.<br>γ = 90°. |
| Volume                            | 2621.17(18) Å <sup>3</sup>                                                                          |
| Z                                 | 4                                                                                                   |
| Density (calculated)              | 1.574 Mg/m <sup>3</sup>                                                                             |
| Absorption coefficient            | 1.181 mm <sup>-1</sup>                                                                              |
| F(000)                            | 1248                                                                                                |
| Crystal size                      | 0.36 x 0.29 x 0.1 mm <sup>3</sup>                                                                   |
| Theta range for data collection   | 2.025 to 27.900°.                                                                                   |
| Index ranges                      | -15 < h < 15, -25 < k < 25, -15 < l < 15                                                            |
| Reflections collected             | 96586                                                                                               |
| Independent reflections           | 6238 [R(int) = 0.0997]                                                                              |
| Completeness to theta = 25.242°   | 100.0 %                                                                                             |
| Absorption correction             | Semi-empirical from equivalents                                                                     |
| Max. and min. transmission        | 0.7456 and 0.6324                                                                                   |
| Refinement method                 | Full-matrix least-squares on F <sup>2</sup>                                                         |
| Data / restraints / parameters    | 6238 / 0 / 328                                                                                      |
| Goodness-of-fit on F <sup>2</sup> | 1.009                                                                                               |
| Final R indices [I > 2σ(I)]       | R <sup>1</sup> = 0.0352, wR <sup>2</sup> = 0.0756                                                   |
| R indices (all data)              | R <sub>1</sub> = 0.0648, wR <sub>2</sub> = 0.0885                                                   |
| Extinction coefficient            | n/a                                                                                                 |
| Largest diff. peak and hole       | 0.742 and -1.319 e.Å <sup>-3</sup>                                                                  |

<sup>a</sup> $R_1 = \sum ||F_o| - |F_c|| / \sum |F_o|$ . <sup>b</sup> $wR_2 = ([\sum w(F_o^2 - F_c^2)^2] / [\sum w(F_o^2)^2])^{1/2}$ ;  $w = 1/[\sigma^2(F_o^2) + (ap)^2 + bp]$ ;  $p = (F_o^2 + 2F_c^2)/3$  with  $a = 0.0370$  and  $b = 4.2008$ .

## 2.3 [(*o*-(Me<sub>2</sub>N)C<sub>6</sub>H<sub>4</sub>)SbPh<sub>3</sub>][OTf] (5 [OTf])

**Table S3.** Crystal data, data collection, and structure refinement for 5[OTf]

|                                   |                                                                                          |
|-----------------------------------|------------------------------------------------------------------------------------------|
| Empirical formula                 | C <sub>27</sub> H <sub>25</sub> F <sub>3</sub> N O <sub>3</sub> S Sb                     |
| Formula weight                    | 622.29                                                                                   |
| Temperature                       | 110.0 K                                                                                  |
| Wavelength                        | 0.71073 Å                                                                                |
| Crystal system                    | Orthorhombic                                                                             |
| Space group                       | Pbca                                                                                     |
| Unit cell dimensions              | a = 18.642(2) Å<br>b = 14.0067(18) Å<br>c = 19.752(2) Å<br>α = 90°<br>β = 90°<br>γ = 90° |
| Volume                            | 5157.5(10) Å <sup>3</sup>                                                                |
| Z                                 | 8                                                                                        |
| Density (calculated)              | 1.603 Mg/m <sup>3</sup>                                                                  |
| Absorption coefficient            | 1.202 mm <sup>-1</sup>                                                                   |
| F(000)                            | 2496                                                                                     |
| Crystal size                      | 0.45 x 0.05 x 0.04 mm <sup>3</sup>                                                       |
| Theta range for data collection   | 2.062 to 27.974°                                                                         |
| Index ranges                      | -24 < h < 24, -18 < k < 18, -25 < l < 25                                                 |
| Reflections collected             | 114700                                                                                   |
| Independent reflections           | 6139 [R(int) = 0.1617]                                                                   |
| Completeness to theta = 25.242°   | 100.0 %                                                                                  |
| Absorption correction             | Semi-empirical from equivalents                                                          |
| Max. and min. transmission        | 0.7456 and 0.5849                                                                        |
| Refinement method                 | Full-matrix least-squares on F <sup>2</sup>                                              |
| Data / restraints / parameters    | 6139 / 0 / 328                                                                           |
| Goodness-of-fit on F <sup>2</sup> | 1.049                                                                                    |
| Final R indices [I > 2σ(I)]       | R <sup>1</sup> = 0.0448, wR <sup>2</sup> = 0.1024                                        |
| R indices (all data)              | R <sub>1</sub> = 0.0722, wR <sub>2</sub> = 0.1220                                        |
| Extinction coefficient            | 0.00058(14)                                                                              |
| Largest diff. peak and hole       | 1.445 and -1.334 e.Å <sup>-3</sup>                                                       |

<sup>a</sup> $R_1 = \sum ||F_o| - |F_c|| / \sum |F_o|$ . <sup>b</sup> $wR_2 = ([\sum w(F_o^2 - F_c^2)^2] / [\sum w(F_o^2)^2])^{1/2}$ ;  $w = 1/[\sigma^2(F_o^2) + (ap)^2 + bp]$ ;  $p = (F_o^2 + 2F_c^2)/3$  with  $a = 0.00313$  and  $b = 14.5167$ .

## 2.4 [(*o*-(Me<sub>2</sub>NCH<sub>2</sub>)C<sub>6</sub>H<sub>4</sub>)SbPh<sub>3</sub>][OTf] (6[OTf])

**Table S4.** Crystal data, data collection, and structure refinement for 6[OTf]

|                                   |                                                                                                   |
|-----------------------------------|---------------------------------------------------------------------------------------------------|
| Empirical formula                 | C <sub>28</sub> H <sub>27</sub> F <sub>3</sub> N O <sub>3</sub> S Sb                              |
| Formula weight                    | 636.31                                                                                            |
| Temperature                       | 110.0 K                                                                                           |
| Wavelength                        | 0.71073 Å                                                                                         |
| Crystal system                    | Monoclinic                                                                                        |
| Space group                       | <i>P</i> 1 2 <sub>1</sub> /c 1                                                                    |
| Unit cell dimensions              | a = 9.9453(7) Å<br>b = 11.0052(8) Å<br>c = 25.4792(17) Å<br>α = 90°<br>β = 101.217(4)°<br>γ = 90° |
| Volume                            | 2735.4(3) Å <sup>3</sup>                                                                          |
| Z                                 | 4                                                                                                 |
| Density (calculated)              | 1.545 Mg/m <sup>3</sup>                                                                           |
| Absorption coefficient            | 1.135 mm <sup>-1</sup>                                                                            |
| F(000)                            | 1280                                                                                              |
| Crystal size                      | 0.55 x 0.1 x 0.1 mm <sup>3</sup>                                                                  |
| Theta range for data collection   | 1.630 to 27.696°                                                                                  |
| Index ranges                      | -12 < = h < = 12, -14 < = k < = 14, -33 < = l < = 33                                              |
| Reflections collected             | 87657                                                                                             |
| Independent reflections           | 6349 [R(int) = 0.1112]                                                                            |
| Completeness to theta = 25.242°   | 100.0 %                                                                                           |
| Absorption correction             | Semi-empirical from equivalents                                                                   |
| Max. and min. transmission        | 0.7455 and 0.5519                                                                                 |
| Refinement method                 | Full-matrix least-squares on F <sup>2</sup>                                                       |
| Data / restraints / parameters    | 6349 / 205 / 392                                                                                  |
| Goodness-of-fit on F <sub>2</sub> | 1.171                                                                                             |
| Final R indices [I > 2σ(I)]       | R <sub>1</sub> <sup>a</sup> = 0.0991, wR <sub>2</sub> <sup>b</sup> = 0.1890                       |
| R indices (all data)              | R <sub>1</sub> = 0.1296, wR <sub>2</sub> = 0.2027                                                 |
| Extinction coefficient            | 0.0014(3)                                                                                         |
| Largest diff. peak and hole       | 1.332 and -1.787 e.Å <sup>-3</sup>                                                                |

<sup>a</sup> $R_1 = \sum ||F_o| - |F_c|| / \sum |F_o|$ . <sup>b</sup> $wR_2 = ([\sum w(F_o^2 - F_c^2)^2] / [\sum w(F_o^2)^2])^{1/2}$ ;  $w = 1 / [\sigma^2(F_o^2) + (ap)^2 + bp]$ ;  $p = (F_o^2 + 2F_c^2) / 3$  with  $a = 0.0001$  and  $b = 35.9234$ .

## 2.5 [Sb(C<sub>6</sub>F<sub>5</sub>)<sub>4</sub>][SbCl<sub>6</sub>] (7[SbCl<sub>6</sub>])

**Table S5.** Crystal data, data collection, and structure refinement for 7[SbCl<sub>6</sub>]

|                                   |                                                                                                |
|-----------------------------------|------------------------------------------------------------------------------------------------|
| Empirical formula                 | C <sub>24</sub> Cl <sub>6</sub> F <sub>20</sub> Sb <sub>2</sub>                                |
| Formula weight                    | 1124.44                                                                                        |
| Temperature                       | 150(2) K                                                                                       |
| Wavelength                        | 0.71073 Å                                                                                      |
| Crystal system                    | Monoclinic                                                                                     |
| Space group                       | P 1 2 <sub>1</sub> 1                                                                           |
| Unit cell dimensions              | a = 17.482(4) Å<br>b = 21.716(5) Å<br>c = 19.115(4) Å<br>α = 90°<br>β = 116.456(6)°<br>γ = 90° |
| Volume                            | 6497(3) Å <sup>3</sup>                                                                         |
| Z                                 | 8                                                                                              |
| Density (calculated)              | 2.299 Mg/m <sup>3</sup>                                                                        |
| Absorption coefficient            | 2.292 mm <sup>-1</sup>                                                                         |
| F(000)                            | 4224                                                                                           |
| Crystal size                      | 0.426 x 0.186 x 0.092 mm <sup>3</sup>                                                          |
| Theta range for data collection   | 1.19 to 30.66°                                                                                 |
| Index ranges                      | -25 < h < 24, -30 < k < 31, -27 < l < 27                                                       |
| Reflections collected             | 159165                                                                                         |
| Independent reflections           | 39702 [R(int) = 0.1041]                                                                        |
| Completeness to theta = 30.66°    | 99.1 %                                                                                         |
| Absorption correction             | Semi-empirical from equivalents                                                                |
| Max. and min. transmission        | 0.82 and 0.66                                                                                  |
| Refinement method                 | Full-matrix least-squares on F <sub>2</sub>                                                    |
| Data / restraints / parameters    | 39702 / 1 / 1874                                                                               |
| Goodness-of-fit on F <sub>2</sub> | 1.005                                                                                          |
| Final R indices [I > 2σ(I)]       | R <sub>1</sub> <sup>a</sup> = 0.0472, wR <sub>2</sub> <sup>b</sup> = 0.0922                    |
| R indices (all data)              | R <sub>1</sub> = 0.0823, wR <sub>2</sub> = 0.1167                                              |
| Absolute structure parameter      | 0.143(16)                                                                                      |
| Largest diff. peak and hole       | 1.079 and -1.346 e.Å <sup>-3</sup>                                                             |

<sup>a</sup> $R_1 = \sum ||F_o| - |F_c|| / \sum |F_o|$ . <sup>b</sup> $wR_2 = ([\sum w(F_o^2 - F_c^2)^2] / [\sum w(F_o^2)^2])^{1/2}$ ;  $w = 1 / [\sigma^2(F_o^2) + (ap)^2 + bp]$ ;  $p = (F_o^2 + 2F_c^2) / 3$  with  $a = 0.0407$  and  $b = 0.00$ .

### 3 Computational Details

#### 3.1 [(*o*-(Me<sub>2</sub>N)C<sub>6</sub>H<sub>4</sub>)SbPh<sub>3</sub>]<sup>+</sup> (5<sup>+</sup>)

Table S6. XYZ coordinates of the optimized geometry of 5<sup>+</sup>

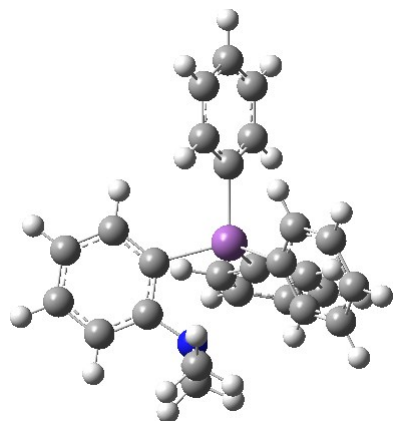

|    |           |           |           |   |           |           |           |
|----|-----------|-----------|-----------|---|-----------|-----------|-----------|
| Sb | 0.254890  | -0.029084 | -0.006581 | C | -0.483066 | 4.133824  | -1.060417 |
| N  | -2.547314 | 0.205567  | -0.761231 | H | -1.241479 | 4.878500  | -0.832194 |
| C  | 2.219894  | -0.780900 | -0.026817 | C | 0.610896  | 4.469802  | -1.861306 |
| C  | 0.379618  | 1.889671  | -0.844290 | H | 0.700165  | 5.476862  | -2.260300 |
| C  | -0.880363 | -1.524261 | -0.933158 | C | 1.593822  | 3.522298  | -2.143528 |
| C  | -0.355350 | 0.137937  | 1.987810  | H | 2.449785  | 3.788554  | -2.757650 |
| C  | 2.972294  | -0.826269 | 1.152339  | C | 1.487490  | 2.229875  | -1.627788 |
| H  | 2.545561  | -0.490193 | 2.096662  | H | 2.273501  | 1.504385  | -1.830839 |
| C  | 4.279939  | -1.312685 | 1.121446  | C | -0.959341 | -0.960008 | 2.612355  |
| H  | 4.863959  | -1.349192 | 2.037216  | H | -1.134413 | -1.886417 | 2.065078  |
| C  | 4.834473  | -1.750590 | -0.080989 | C | -1.348834 | -0.862689 | 3.947840  |
| H  | 5.853303  | -2.128646 | -0.101513 | H | -1.818982 | -1.711677 | 4.437111  |
| C  | 4.086165  | -1.707094 | -1.259013 | C | -1.135159 | 0.323286  | 4.652427  |
| H  | 4.518493  | -2.051205 | -2.195025 | H | -1.441428 | 0.395698  | 5.692839  |
| C  | 2.778997  | -1.223376 | -1.234223 | C | -0.530032 | 1.415131  | 4.029120  |
| H  | 2.202089  | -1.200253 | -2.159649 | H | -0.362471 | 2.336525  | 4.580594  |
| C  | -0.432736 | -2.810753 | -1.242615 | C | -0.136152 | 1.326155  | 2.693366  |
| H  | 0.604368  | -3.097398 | -1.077313 | H | 0.335900  | 2.181797  | 2.211904  |
| C  | -1.344568 | -3.731314 | -1.758952 | C | -2.905316 | 0.993952  | -1.949132 |
| H  | -1.017089 | -4.737079 | -2.007404 | H | -2.078465 | 0.977696  | -2.667131 |
| C  | -2.678106 | -3.362043 | -1.952562 | H | -3.087885 | 2.031558  | -1.651146 |
| H  | -3.383193 | -4.084754 | -2.354946 | H | -3.812516 | 0.607205  | -2.439633 |
| C  | -3.118399 | -2.076603 | -1.634983 | C | -3.604797 | 0.278086  | 0.255097  |
| H  | -4.159781 | -1.801130 | -1.789629 | H | -4.578732 | -0.066211 | -0.127153 |
| C  | -2.211609 | -1.149427 | -1.119073 | H | -3.710701 | 1.319416  | 0.579329  |
| C  | -0.603618 | 2.841870  | -0.552243 | H | -3.327226 | -0.329859 | 1.121517  |
| H  | -1.457812 | 2.576882  | 0.069296  |   |           |           |           |

### 3.2 $[(o\text{-}(\text{Me}_2\text{NCH}_2)\text{C}_6\text{H}_4)\text{SbPh}_3]^+$ ( $6^+$ )

Table S7. XYZ coordinates of the optimized geometry of  $6^+$

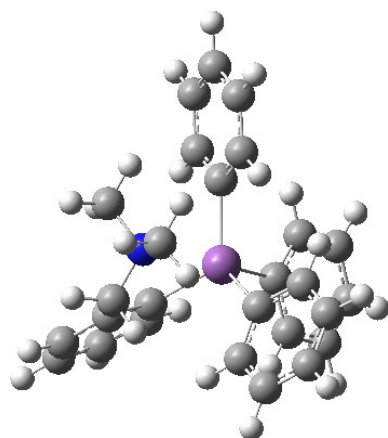

|    |           |           |           |   |           |           |           |
|----|-----------|-----------|-----------|---|-----------|-----------|-----------|
| Sb | 0.191784  | 0.031428  | 0.031696  | H | 2.812543  | 1.823920  | -0.286460 |
| C  | -0.317577 | -0.808203 | 1.885290  | C | -0.481837 | -1.152035 | -1.576870 |
| C  | -0.830813 | -2.109822 | 1.919697  | C | 0.453505  | -1.608879 | -2.512308 |
| H  | -0.965639 | -2.679765 | 1.000225  | H | 1.506646  | -1.351349 | -2.412967 |
| N  | -2.511747 | 0.321955  | -0.176014 | C | 0.038213  | -2.404677 | -3.580466 |
| C  | -1.158943 | -2.693852 | 3.143546  | H | 0.764056  | -2.755299 | -4.309007 |
| H  | -1.554611 | -3.705877 | 3.170654  | C | -1.307516 | -2.742479 | -3.706797 |
| C  | -0.971701 | -1.981721 | 4.328650  | H | -1.637578 | -3.359500 | -4.538492 |
| H  | -1.231182 | -2.436859 | 5.280941  | C | -2.238355 | -2.282264 | -2.774352 |
| C  | -0.434041 | -0.694809 | 4.296391  | H | -3.290091 | -2.540585 | -2.884933 |
| H  | -0.266937 | -0.149728 | 5.221731  | C | -1.839652 | -1.485225 | -1.701147 |
| C  | -0.098919 | -0.107262 | 3.076325  | C | -2.852135 | -1.011580 | -0.681049 |
| H  | 0.346188  | 0.886558  | 3.069391  | H | -3.864584 | -1.020675 | -1.119279 |
| C  | 0.033282  | 2.117201  | -0.135574 | H | -2.872111 | -1.701395 | 0.173243  |
| C  | -0.460847 | 2.904060  | 0.909299  | C | -3.253192 | 0.608786  | 1.057005  |
| H  | -0.757744 | 2.457508  | 1.856487  | H | -3.001758 | 1.615841  | 1.405480  |
| C  | -0.591398 | 4.282425  | 0.735067  | H | -2.983186 | -0.114243 | 1.834221  |
| H  | -0.971601 | 4.895627  | 1.548090  | H | -4.341256 | 0.563594  | 0.887351  |
| C  | -0.236658 | 4.870360  | -0.479682 | C | -2.828939 | 1.333490  | -1.195091 |
| H  | -0.343998 | 5.943560  | -0.614143 | H | -2.589318 | 2.331040  | -0.815721 |
| C  | 0.257833  | 4.084987  | -1.521564 | H | -3.898596 | 1.299161  | -1.457313 |
| H  | 0.534705  | 4.542680  | -2.467793 | H | -2.240221 | 1.152108  | -2.101355 |
| C  | 0.397897  | 2.707327  | -1.350686 | C | 4.558041  | 0.571103  | -0.191111 |
| H  | 0.781913  | 2.102831  | -2.173289 | H | 5.246893  | 1.404604  | -0.301755 |
| C  | 2.789026  | -1.567904 | 0.106972  | C | 5.046918  | -0.726347 | -0.049179 |
| H  | 2.109286  | -2.412202 | 0.230353  | H | 6.119049  | -0.905435 | -0.051708 |
| C  | 2.291179  | -0.265455 | -0.042406 | C | 4.163247  | -1.797342 | 0.101645  |
| C  | 3.180904  | 0.804379  | -0.186049 | H | 4.545235  | -2.808216 | 0.218298  |

#### 4 References

1. Arias Ugarte, R.; Devarajan, D.; Mushinski, R. M.; Hudnall, T. W., Antimony(v) cations for the selective catalytic transformation of aldehydes into symmetric ethers,  $\alpha,\beta$ -unsaturated aldehydes, and 1,3,5-trioxanes. *Dalton Transactions* **2016**, 45 (27), 11150-11161.
2. Fujiwara, M.; Baba, A.; Matsuda, H., Selective  $\alpha$ -cleavage cycloaddition of oxiranes with heterocumulenes catalyzed by tetraphenylstibonium iodide. *J. Heterocycl. Chem.* **1988**, 25 (5), 1351-1357.
